# 1 Pallidal deep brain stimulation alters cortico-striatal synaptic 2 communication in dystonic hamsters

3  
4 Marco Heerdegen<sup>a</sup>, Monique Zwar<sup>a</sup>, Denise Franz<sup>a</sup>, Valentin Neubert<sup>a</sup>, Franz Plocksties<sup>b</sup>,  
5 Christoph Niemann<sup>b</sup>, Dirk Timmermann<sup>b</sup>, Christian Bahls<sup>c</sup>, Ursula van Rienen<sup>c,e</sup>, Maria Paap<sup>d</sup>,  
6 Stefanie Perl<sup>d</sup>, Annika Lüttig<sup>d</sup>, Angelika Richter<sup>d</sup>, Rüdiger Köhling<sup>a,f\*</sup>

7  
8 <sup>a</sup> Oscar Langendorff Institute of Physiology, Rostock University Medical Center

9 <sup>b</sup>Institute of Applied Microelectronics and Computer Engineering, Faculty of Computer  
10 Science and Electrical Engineering, University of Rostock

11 <sup>c</sup>Institute of General Electrical Engineering, Faculty of Computer Science and Electrical  
12 Engineering, University of Rostock

13 <sup>d</sup> Institute of Pharmacology, Pharmacy und Toxicology, Faculty of Veterinary Medicine,  
14 University of Leipzig

15 <sup>e</sup> Department Life, Light & Matter, University of Rostock

16 <sup>f</sup> Department of Ageing of Individuals and Society, University of Rostock

17  
18  
19 \* Corresponding author:

20 Prof. Dr. med. Rüdiger Köhling

21 Oscar Langendorff Institute of Physiology

22 Rostock University Medical Center

23 Gertrudenstr. 9

24 18057 Rostock

25 Germany

26 E-Mail: [ruediger.koehling@uni-rostock.de](mailto:ruediger.koehling@uni-rostock.de)

27 Tel.: +49-381-4948000

28  
29 **Key words:** deep brain stimulation, globus pallidus, dystonia, *dt<sup>SZ</sup>* hamster, inhibition

30 **Declaration of interests:** none

31 **Funding sources:** Funded by the Deutsche Forschungsgemeinschaft (DFG, German Research  
32 Foundation) – SFB 1270/1 - 299150580, TP C03 to AR and RK, TP B03 to DT, TP A02 to UvR

33

## 1 **Abstract**

2 Background: Deep brain stimulation (DBS) of the globus pallidus internus (GPi) is considered to be  
3 the most relevant therapeutic option for patients with severe dystonias, which are thought to arise  
4 from a disturbance in striatal control of the GPi, possibly resulting in thalamic disinhibition. The  
5 mechanisms of GPi-DBS are far from understood. Hypotheses range from an overall silencing of  
6 target nuclei (due to e.g. depolarisation block), via differential alterations in thalamic firing, to  
7 disruption of oscillatory activity in the  $\beta$ -range. Although a disturbance of striatal function is thought  
8 to play a key role in dystonia, the effects of DBS on cortico-striatal function are unknown.

9 Objective: We hypothesised that DBS, via axonal backfiring, or indirectly via thalamic and cortical  
10 coupling, alters striatal network function. We aimed to test this hypothesis in the *dt<sup>sz</sup>*-hamster, an  
11 animal model of inherited generalised, paroxysmal dystonia.

12 Methods: Hamsters (*dt<sup>sz</sup>*-dystonic and non-dystonic controls) were bilaterally implanted with  
13 stimulation electrodes targeting the entopeduncular nucleus (EPN, equivalent of human GPi). DBS  
14 (130 Hz), and sham DBS, were performed in unanaesthetised animals for 3 hours. Synaptic cortico-  
15 striatal field potential responses, as well as miniature excitatory postsynaptic currents (mEPSC) and  
16 firing properties of medium spiny striatal neurons were subsequently recorded in brain slice  
17 preparations obtained from these animals immediately after EPN-DBS, to gauge synaptic  
18 responsiveness of cortico-striatal projections, their inhibitory control, and striatal neuronal  
19 excitability.

20 Results: DBS increased cortico-striatal responses in slices from control, but not dystonic animals.  
21 Inhibitory control of these responses, in turn, was differentially affected: DBS increased inhibitory  
22 control in dystonic, and decreased it in healthy tissue. A modulation of presynaptic mechanisms is  
23 likely involved, as mEPSC frequency was reduced strongly in dystonic, and less prominently in healthy  
24 tissues, while cellular properties of medium-spiny neurons remained unchanged.

25 Conclusion: DBS leads to dampening of cortico-striatal communication with restored inhibitory tone.

## 1 **Introduction**

2 Primary dystonias were first recognised to be linked to brain, particularly to basal ganglia dysfunction  
3 by Charles Marsden and his group [1,2] only as late as in the 1970s. By now, it is being recognised  
4 that in dystonic patients, a pathological cortico-striatal function, and subsequent disturbance of  
5 striatal control of GPi, are likely to be important factors of dystonic dysfunction[1]. This disturbance  
6 is characterised by increased synaptic plasticity within the cortico-basal ganglia network [3–5], and  
7 speculated to result in a shift of the balance toward the direct pathway [6] (Fig. 5A). Beyond the basal  
8 ganglia, such network disturbances are reflected in loss of cortical inhibition [7–9], and a relative  
9 persistence of  $\beta$ -band synchronisation during movement initiation [10], as well as dominant low-  
10 frequency pallidal activity in the  $\alpha$ -band at rest [11,12]. Indeed, a loss of inhibitory tone within the  
11 extended network is being discussed [13], although it is still unresolved whether the entire network  
12 or parts of it would be affected [14]. Although a contribution of cerebellar dysfunction is being  
13 assumed [5,15], an altered striatal function is likely a major causal factor in primary dystonias.

14 Deep brain stimulation (DBS) is clearly the most important innovation for the treatment of dystonias,  
15 and often the “only option for symptom reduction” [16]. As a consequence, clinical trials  
16 implementing DBS in dystonia [17,18] show that it is largely successful in patient groups particularly  
17 with idiopathic or genetic isolated dystonias. However, as much as the pathomechanisms of dystonia  
18 are still not fully understood, this knowledge gap extends even more so to the mechanisms  
19 underlying the effects of DBS in dystonia for several reasons: One is that DBS has most widely been  
20 investigated in patients with and animal models of Parkinson’s disease (PD) (see reviews [19,20]),  
21 which allows inference on DBS mechanisms in dystonia only in a limited way, also since the target  
22 nuclei (GPi vs. nucleus subthalamicus) are usually not the same. A second is that most of the  
23 hypotheses on this question are derived either from DBS in normal primates, or from DBS-like  
24 stimulation in vitro in normal rodent tissue, or from cortical or basal ganglia recordings of e.g. local  
25 fields in patients which obviously limit the extent to which the entire network can be assessed.  
26 Importantly, the effect of DBS in dystonias, in contrast to most motor symptoms of PD, require at

1 least hours of stimulation, indicating that functional network changes likely occur [20]. To summarise  
2 the findings so far, the data from PD patients suggest that pathological oscillatory activity prominent  
3 in the  $\beta$ -band can be reduced by subthalamic DBS [11,21,22] – it is unknown whether this is the case  
4 for prominent resting  $\alpha$ -band or transient  $\beta$ -band desynchronization during movement activity in  
5 dystonia. What is known is that pallidal DBS in dystonic patients does have network effects  
6 interpreted by the authors as inhibitory – increased cortical excitability and synaptic plasticity tested  
7 by e.g. paired associative stimulation or so-called cortical silent period using motor evoked potentials  
8 seem to be normalised [13,23–25] and firing of thalamic neurons is altered, albeit differentially  
9 (reduced in the majority of neurons, increased in a minority) [26]. It is thus safe to conclude that  
10 cortical excitability is somehow reduced by pallidal DBS, but nothing is known on alterations in the  
11 extended network, in particular regarding cortico-striatal functional connectivity. Looking at animal  
12 studies, in one investigation in normal primates, pallidal DBS completely silenced neuronal firing in  
13 this nucleus – presumably via activation of GABAergic afferents to the nucleus [27]. In contrast to  
14 this, a study on DBS-like stimulation in normal rat brain *in vitro* led to practically opposite effects,  
15 with high-frequency stimulation leading to prolonged afterdepolarisations mediated by cholinergic  
16 inputs, and no silencing of neurons [28] – thus the issue remains undecided. More importantly,  
17 animal studies so far were mainly conducted on healthy controls. In studies using animal models of  
18 dystonia, in turn, DBS-stimulation was delivered only under deep anaesthesia (urethane [29,30], or  
19 pentobarbital [31]). Even though anaesthesia (particularly urethane) is known to distort cortico-  
20 striatal connectivity [32], one of these studies does indicate that even DBS under pentobarbital  
21 anaesthesia does have a reducing effect on dystonia. Data on DBS effects in dystonia models in  
22 awake and behaving animals are completely lacking.

23 In view of the scant knowledge on the mechanisms of DBS, and in particular on excitability changes in  
24 the nuclei presumably being strongly involved in dystonic pathophysiology, i.e. the corpus striatum,  
25 we set out to test the lasting effect of prolonged (3 hours) pallidal DBS, presenting the first study so  
26 far conducting DBS in freely moving dystonic animals. For this, we chose an animal model which at

1 least in many ways resembles the human situation of generalised paroxysmal dystonia, the *dt<sup>sz</sup>*  
2 hamster, which we have extensively characterised in the past [33–38]. Although the generalisability  
3 to human primary dystonia is unclear, there are important similarities: This strain shows spontaneous  
4 paroxysmal dystonic attacks which can also be provoked by handling and stress. As speculated for at  
5 least some human dystonias [3–5], this animal model is also associated with increased cortico-striatal  
6 excitability [39], on the basis of reduced intra-striatal GABAergic signalling, resulting in overall  
7 increased EPN/GPi inhibition [35,40]. Interestingly, this is in line with disturbed cortico-striatal  
8 communication [41] and increased pallidal inhibition also in DYT1 mouse [42]. As we could show in a  
9 recent study [43], short term DBS of the entopeduncular nucleus with 130 Hz effectively reduces  
10 dystonic attacks. Importantly, in the present study we used the same DBS protocol in freely moving  
11 *dt<sup>sz</sup>* hamsters to elucidate underlying mechanisms in electrophysiological studies on the cortico-  
12 striatal network. In this paper, we propose as a possible mechanism of DBS a dampening of cortico-  
13 striatal synaptic communication possibly due to presynaptic changes mediated anterogradely via  
14 thalamo-striatal or thalamo-cortical projections.

## 1 **Material and methods**

### 2 **Animals**

3 The experiments were carried out using two groups of age-matched dystonic  $dt^{sz}$  mutant hamsters  
4 (inbred; total n=84), obtained by selective breeding (Institute of Pharmacology, University of Leipzig)  
5 as described previously [37], and two groups of age-matched non-dystonic control hamsters  
6 (Mesocricetus auratus, outbred, total of n=43) provided by a commercial breeder (JANVIER LABS;  
7 origin: Central Institute for Laboratory Animal Breeding, Hannover, Germany,). Dystonic  $dt^{sz}$  hamsters  
8 display spontaneous dystonic attacks particularly after stress, as described below [37,38]. The  
9 animals were kept under controlled environmental conditions with a 14 h/10 h light/dark cycle and  
10 an ambient temperature of 23°C. Standard diet and water were supplied ad libitum.

11 After weaning at the age of 21 days, all groups of hamsters were screened for dystonic symptoms  
12 three times every 2 to 3 days by mild stress (triple stimulation technique), as described previously  
13 [37]. All  $dt^{sz}$  hamsters used in this study exhibited severe dystonia with at least stage 3. Healthy  
14 control hamsters were treated equally. All animal experiments were carried out in accordance with  
15 the guidelines of the EU Directive 2012/63/EU and the federal laws for the protection of animals  
16 under licence Az: 7221.3-1-053/17.

### 17 **Surgical procedure for deep-brain stimulation electrode implantation and stimulation protocol**

18 Animals (30-42 days old) were fixed in a stereotactic frame (Narishige, Japan) under deep  
19 anaesthesia with isoflurane (Isofluran, Baxter, Deerfield, IL, USA; Univentor 1200 Anaesthesia Unit +  
20 Univentor 2010 Scavenger Unit, Biomedical Instruments, Zöllnitz, Germany). The periosteum was  
21 additionally treated with the local anaesthetic bupivacaine (bupivacaine 0.25% JENAPHARM®). Two  
22 concentric bipolar electrodes (platinum-iridium Pt/Ir; SNEX-100, Microprobes, Gaithersburg, MD,  
23 USA) were placed bilaterally in the entopeduncular nucleus (EPN; corresponding to GPi in humans;  
24 stereotaxic coordinates AP: -0.6 mm, ML:  $\pm$  2.2 mm, DV: -0.6 mm relative to Bregma from the golden  
25 hamster atlas [44]). To provide firm fixation of the electrodes, two screws were anchored in the skull

1 behind the electrodes and enclosed with dental adhesive (Heliobond + Compo glass flow, Schaan,  
2 Liechtenstein; SDR<sup>®</sup> flow+, Dentsply DeTrey GmbH, Konstanz, Germany). After 3-5 days of recovery,  
3 the electrode wires were connected to an external programmable stimulator (Institute of Applied  
4 Microelectronics, Faculty of Computer Science and Electrical Engineering, University of Rostock)  
5 generating charge-balanced rectangular current pulses. DBS (130 Hz, 50  $\mu$ A, 60  $\mu$ s pulse duration)  
6 was performed for three hours on awake and freely moving animals. These parameters were chosen  
7 with regard to the proven antidystonic efficacy [43]. Every second  $dt^{sz}$  or control hamster was used  
8 for sham stimulation (i.e. electrode implantation active stimulation) to be able to compare effects  
9 with and without stimulation. These sham-stimulated groups received the same treatment as the  
10 stimulated groups, but with the stimulator turned off.

#### 11 **Brain slice preparation for analysis of striatal network excitability and inhibitory tone**

12 Immediately after bilateral DBS or sham stimulation, the animals were decapitated under deep  
13 anaesthesia. The electrodes were carefully removed from the skull, without causing shearing  
14 movements, and the brain was quickly removed and chilled in ice-cold sucrose solution, containing  
15 (in mM): NaCl 87, NaHCO<sub>3</sub> 25, KCl 2.5, NaH<sub>2</sub>PO<sub>4</sub> 1.25, CaCl<sub>2</sub> 0.5, MgCl<sub>2</sub> 7, glucose 10 and sucrose 75.  
16 The brain was then cut dorsally at an angle of 40° to the horizontal axis and glued with the cut off  
17 surface to the microtome table (VT1200S, Leica Biosystems Nussloch, Germany) (Fig. 1A). The angled  
18 brain was cut horizontally in slices of 400  $\mu$ m or 300  $\mu$ m (field or patch clamp recordings,  
19 respectively), maintaining synaptic connections between motor cortex and striatum. After cutting,  
20 the slices (total of n=74 from control and of n=165 from  $dt^{sz}$ -hamsters) were incubated for 60 min in  
21 sucrose solution at room temperature, before transferral to an interface-type recording chamber  
22 (BSC-BU, Harvard Apparatus Inc, March-Hugstetten, USA) perfused with artificial cerebrospinal fluid  
23 (ACSF) containing (in mM): NaCl 124, NaHCO<sub>3</sub> 26, KCl 3, NaH<sub>2</sub>PO<sub>4</sub> 1.25, CaCl<sub>2</sub> 2.5 and glucose 10, kept  
24 constant at 32°C (TC-10, npi electronic GmbH, Tamm, Germany).

25

## 1 **Field potential recordings**

2 Field excitatory postsynaptic potentials (fEPSP) were recorded from the dorso-medial part of the  
3 striatum using an ACSF-filled glass pipette with a silver/silver chloride wire as described before  
4 [39,45]. To activate cortical projections to the striatal network, a bipolar stimulation electrode (PT-  
5 2T, Science Products GmbH, Hofheim, Germany) was placed into the underlying white matter of the  
6 adjacent cortex (Fig. 1B). Current-controlled stimulation was delivered by a Master-8 pulse stimulator  
7 (AMPI, Jerusalem, Israel) connected to a stimulus isolator (A365, WPI Inc, Sarasota, USA). To gauge  
8 cortico-striatal excitability, evoked input-output responses were characterised by increasing stimulus  
9 intensity stepwise until reaching saturating responses (remaining always below maximal intensity of  
10 400  $\mu$ A). For further investigations, stimulus strength was set to 50% of saturating response intensity  
11 to maintain dynamic range of responses. To test for synaptic facilitation and/or depression, paired-  
12 pulses were delivered at 40 ms inter-pulse-intervals (IPI) every 30 s. The paired-pulse ratio (PPR) was  
13 calculated by dividing the slope of the second response by the slope of the first response (s-fEPSP2/s-  
14 fEPSP1). In addition, we calculated the coefficient of variation of these synaptically evoked responses  
15 from the first 40 responses under baseline conditions in each group to be able to compare response  
16 variability. To determine the degree of inhibitory tone controlling PPR, the GABA<sub>A</sub> receptor  
17 antagonist gabazine (SR 95531 hydrobromide, Tocris, Wiesbaden-Nordenstadt, Germany, 5  $\mu$ M) was  
18 bath-applied for 60 min after having recorded a minimum of 20 min stable baseline responses.  
19 Signals were recorded using EXT-10-2F field-potential amplifier in AC mode (low pass filter at 1 kHz,  
20 npi, Tamm, Germany). Signals were processed and digitised at 10 kHz with Power1401 A/D converter  
21 (Cambridge Electronic Design, Cambridge, UK).

## 22 **Patch-clamp recordings**

23 Patch-clamp recordings from medium spiny striatal neurons were obtained to assess frequency and  
24 kinetic properties of spontaneous miniature excitatory postsynaptic currents (mEPSCs) as a measure  
25 of presynaptic cortico-striatal functional modulations, and to gauge neuronal properties of medium



1 spiny striatal neurons, identified by their characteristic firing patterns (cf. Fig. 4). Patch-clamp  
2 recordings were performed at room temperature in corticostriatal slices submerged in recording  
3 ACSF with borosilicate pipettes (3.1-8.5 M $\Omega$ , mean  $5.5 \pm 0.1$  M $\Omega$ , n = 56, pulled with DMZ Zeitz  
4 puller, Zeitz-Instrumente Vertriebs GmbH, Martinsried, Germany) filled with a solution containing (in  
5 mM): K-gluconate 115, KCl 20, MgCl<sub>2</sub> 2, HEPES 10, Na<sub>2</sub>-ATP 2, Mg-ATP 2, Na<sub>2</sub>-GTP 0.3; pH set to 7.3  
6 and osmolarity to  $280 \pm 5$  mosmol/l. MSN were visualized via differential interference contrast  
7 microscopy and a CCD camera (Till Photonics, Gräfelfing, Germany) enabling visual differentiation  
8 between MSN and other striatal neurons by cell shape and size. Visual classification was further re-  
9 checked by electrophysiological characterization of MSN showing specific passive and active  
10 membrane properties. The MSN recordings seals were  $> 1$  G $\Omega$  ( $6.9 \pm 1.8$  G $\Omega$ , n = 56) and liquid  
11 junction potentials and series resistance ( $17.6 \pm 0.7$  M $\Omega$ , n = 56) were not compensated. Voltage- and  
12 current-clamp data were recorded with an EPC-10 amplifier (HEKA, Lambrecht, Germany), filtered at  
13 1 kHz, digitized at 20 kHz and stored via Patchmaster v2.20 software (HEKA, Lambrecht, Germany).  
14 The resting membrane potential was measured initially after establishing whole cells configuration.  
15 The number of action potentials, the threshold current (rheobase) and the latency of the first action  
16 potential at rheobase were achieved at 0 pA holding current by depolarizing current injections of 500  
17 ms duration from 0 to at least 300 pA (50 pA increments). The hyperpolarisation-activated, cyclic-  
18 nucleotide-modulated non selective (HCN) channel-dependent voltage sag was measured during  
19 hyperpolarization from a holding potential of -70 mV by current injections of 1 s duration from 0 mV  
20 to -300 pA (50 pA increments). The voltage sag amplitude was calculated as difference between the  
21 maximal hyperpolarization at the beginning and the steady state voltage at the end of the current  
22 injection. Cellular input resistance was calculated from the slope of the steady state current-voltage  
23 relation resulting from voltage steps (2 mV increments, 1 s duration) of -60 mV to -80 mV at from a  
24 holding potential -70 mV. For measurements of miniature excitatory postsynaptic currents (mEPSC)  
25 the membrane potential was clamped at -70 mV and TTX (1  $\mu$ M) and gabazine (5  $\mu$ M) were added to  
26 the ACSF. mEPSC events were low-pass filtered at 1 kHz and detected within 5 min with a signal to

1 noise ratio of 5:1 using the software MiniAnalysis v.6.0.7 (Synptosoft, Decatur, USA). Off-line  
2 analysis of patch-clamp data was performed using Fitmaster v2.11 software (HEKA), Office Excel 2003  
3 (Microsoft, Redmond, USA) und SigmaPlot 10.0 (Systat Software GmbH, Erkrath, Germany).

#### 4 **Data analysis**

5 Data of extracellular recordings were analysed using Signal 2.16 software (Cambridge Electronic  
6 Design, Cambridge, UK). All values are given as means  $\pm$  SEM; n refers to numbers of slices unless  
7 otherwise stated. Statistical analysis was performed with SigmaStat and SigmaPlot software (Systat  
8 Software Inc., San Jose, CA, USA). The significance of difference between the median values of the  
9 input-output activity of stimulated and sham-stimulated  $dt^{sz}$  mutant and control groups were  
10 evaluated using a two-way repeated measures analysis of variance (ANOVA, two factor repetition)  
11 and a post-hoc multiple comparison procedure (Holm-Sidak method). For all other analyses,  
12 statistical significance was tested using the Wilcoxon Rank Sum Test for paired data and the  
13 Wilcoxon-Mann-Whitney Rank Sum Test for unpaired data. A probability value of  $P < 0.05$  was  
14 considered significant indicated by asterisks (\* unpaired test) and by hash (# paired test) respectively.

## 1 **Results**

2 The aim of this study was to explore the possible mechanisms underlying the antidystonic effect of  
3 3h-DBS delivered to freely moving animals reported recently by our group [43]. Our focus was on  
4 exploring changes in cortico-striatal communication, since dystonias are thought to involve a  
5 disturbance in the balance of striatal control of the GPI [1,6], the equivalent of the entopeduncular  
6 nucleus (EPN) in rodents.

### 7 **Input-output relationship of cortico-striatal synaptic connections**

8 We were first interested whether EPN-DBS changed the overall efficacy of synaptic connectivity  
9 between motor cortex and striatum. To gauge this, we explored the so-called input-output  
10 relationship of evoked field potential responses in the dorso-medial striatum to cortical activation via  
11 local afferent fibre stimulation. For this, stimulation intensity was stepwise increased from threshold  
12 to saturating response. As Fig. 2A illustrates, the resulting field excitatory postsynaptic potentials  
13 (fEPSP) increased in amplitude with cumulative rising stimulus in both groups, healthy (WT; triangles)  
14 and  $dt^{sz}$  (circles). Of note, without DBS (empty symbols), the magnitudes of the responses in healthy  
15 tissue were indeed comparable to, but somewhat smaller than in  $dt^{sz}$ , with maxima at around 0.4 V/s  
16 (control) to 0.5 V/s ( $dt^{sz}$ ), as already shown previously [46]. As Fig. 2A shows, EPN-DBS (filled symbols)  
17 altered the responsiveness of this cortico-striatal synapse, but only in healthy tissue, where it  
18 essentially doubled the slope of the responses ( $p < 0.05$ , ANOVA). Specifically, the mean values of field  
19 potential slopes (in V/s) were  $-0.56 \pm 0.06$  ( $dt^{sz}$ ,  $n=65$ ) and  $-0.44 \pm 0.06$  (control,  $n=14$ ) for sham-  
20 stimulated tissue, and  $-0.61 \pm 0.08$  V ( $dt^{sz}$ ,  $n=42$ ) and  $-0.96 \pm 0.20$  V (control,  $n=19$ ) for EPN-DBS-  
21 stimulated groups, as a response to the highest cortico-striatal stimulus intensity of 400  $\mu$ A. Thus,  
22 DBS enhances synaptic efficiency only in healthy, wild-type tissue.

### 23 **Variability of cortico-striatal synaptic responses**

24 Since DBS is speculated to normalise bursting oscillatory activity [47] and to disrupt aberrant synaptic  
25 transmission [48], we hypothesised that cortico-striatal responses would show greater variability in

1 dystonic tissue, which should be reduced by DBS. As shown in Fig. 2C, the coefficients of variation of  
2 the synaptic responses (all in the range of 0.13 to 0.16, see Table 1 for details) did not differ between  
3 control and dystonic tissue, and remained unaffected by EPN-DBS. Hence, we had to dismiss both  
4 hypotheses.

#### 5 **Paired-pulse ratio (PPR)**

6 We were also interested in the effect of EPN-DBS on short-term plasticity at the cortico-striatal  
7 synapse, since this plasticity governs the fidelity of transmission of repetitive synaptic events. For  
8 this, we gauged paired-pulse responses at the cortico-striatal synapse using fEPSP as before, now  
9 elicited in short succession twice at 40 ms inter-stimulus intervals. Paired pulse response changes  
10 (facilitation or depression of the second response) are generally thought to be based on presynaptic  
11 release probability alterations, with paired-pulse depression (PPD) probably reflecting a presynaptic  
12  $\text{Ca}^{2+}$ -dependent effect on release probability which however is under modulatory tone of GABA and  
13 can thus be reduced with loss of inhibition [49]. Paired-pulse facilitation (PPF), in turn, is supposed to  
14 be caused by an initially low release probability, which increases with residual presynaptic  $\text{Ca}^{2+}$   
15 [50,51]. PPF was present in all groups (Fig. 2B). Thus, the ratio  $2^{\text{nd}}/1^{\text{st}}$  pulse was  $1.15 \pm 0.08$  (control  
16 tissue, sham DBS; n=13),  $1.31 \pm 0.07$  (control tissue, DBS; n=19),  $1.12 \pm 0.04$  ( $dt^{sz}$  tissue, sham DBS;  
17 n=46) and  $1.30 \pm 0.09$  ( $dt^{sz}$  tissue, DBS; n=32); these values did not differ significantly, even though  
18 the values under DBS were always higher than those without – an effect of DBS thus cannot be ruled  
19 out completely.

#### 20 **Inhibitory control of cortico-striatal synaptic communication**

21 With regard to evidence of reduced GABAergic inhibition of striatal projection neurons, probably  
22 based on deficient striatal GABAergic interneurons in dystonic hamsters [33–35] and considering the  
23 postulated GABAergic disinhibition in patients with dystonia, where a shift of balance toward the  
24 indirect pathway is speculated to occur [6], we were interested whether the synaptic responses  
25 evoked in the striatum by cortical afferents would be under the control of GABAergic inhibition, and

1 whether this GABAergic control might change after DBS. We therefore explored the reaction of  
2 evoked fEPSP under the blockade of GABA<sub>A</sub> receptors using gabazine (5 μM) application. As  
3 illustrated in Fig. 3A (dot plot of fEPSP responses during continuing gabazine application) and Fig. 3B  
4 (example traces of fEPSP before and after GABA-block), suppressing GABA<sub>A</sub>-receptor activation  
5 indeed had the effect of increasing the striatal field responses by 2-3 fold. Notably, this was more  
6 significant in control than in dystonic, *dt<sup>sz</sup>* tissue (to 309.8 ± 34.3 % vs. 250.4 ± 34.5 % of control  
7 values, respectively,  $p < 0.05$ , means ± SEM of values of last 5 min, controls  $n = 6$ , *dt<sup>sz</sup>*  $n = 11$ ), suggesting  
8 inhibitory control of synaptic activity to be higher in non-dystonic controls than in dystonic animals.  
9 Importantly, this inhibitory control as evidenced by the gabazine effect was significantly modulated  
10 by DBS, and differentially so in control vs. dystonic group: While in non-dystonic controls, DBS was  
11 associated with a significantly lower increase in fEPSP slope compared to sham-DBS stimulation  
12 ( $p < 0.05$ , ANOVA), the contrary was the case in dystonic, *dt<sup>sz</sup>* tissue, where DBS led to a higher  
13 increase in fEPSP ( $p < 0.05$ , ANOVA). Thus, in the control group, the slope fell from 309.8 ± 34.3 to  
14 263.6 ± 56.1. In slices from *dt<sup>sz</sup>*-hamsters, by contrast, the slope rose from 250.4 ± 34.5 to 282.3 ±  
15 44.0 (controls DBS  $n = 9$ , *dt<sup>sz</sup>* DBS  $n = 12$ , means ± SEM of values of last 5 minutes).

16 We were also interested in which way the PPR would be modulated by GABA<sub>A</sub>-receptor inhibition (5  
17 μM gabazine, 20 min application). In all groups, the PPR was reduced during GABA<sub>A</sub> block, i.e. the  
18 second of these paired responses became similar to the first, or even smaller than it. This suggests  
19 that GABAergic tone apparently also dampens presynaptic release probability at this synapse. Thus,  
20 the reduction amounted to 0.36 ± 0.11 (control tissue, sham DBS;  $n = 11$ ), 0.31 ± 0.13 (control tissue,  
21 DBS;  $n = 9$ ), 0.24 ± 0.11 (*dt<sup>sz</sup>* tissue, sham DBS;  $n = 11$ ) and 0.31 ± 0.09 (*dt<sup>sz</sup>* tissue, DBS;  $n = 12$ ).  
22 Interestingly, the reduction was significant ( $p < 0.05$ , MWRS-test) for healthy tissue only under control  
23 conditions without DBS, and for dystonic tissue only after DBS. Thus, facilitation of responses  
24 reversed to depression in these cases, again supporting the notion that inhibitory control in healthy  
25 tissue is reduced after DBS in healthy tissue, and increased after DBS in dystonic one.

26

## 1 **Spontaneous cortico-striatal synaptic activity**

2 The field potential investigations so far remained on a compound network level. We therefore strove  
3 to look at glutamatergic cortico-striatal synapses in more detail, i.e. on the single-cell level, by  
4 analysing miniature excitatory postsynaptic currents (mEPSC), reflecting spontaneous release activity  
5 from cortical projections. As shown in Fig. 4, EPN-DBS had a strong effect on the frequency of mEPSC,  
6 reducing it in both healthy and dystonic animals. Interestingly, this reduction was stronger in  
7 dystonic tissue, and indeed significant only in this case. Thus, the frequency of mEPSC after EPN-DBS  
8 fell from  $4.11 \pm 0.39$  Hz to  $2.15 \pm 0.69$  Hz ( $p < 0.05$ , MWRS-test) in dystonic tissue, and from  $3.18 \pm 0.5$   
9 to  $1.70 \pm 0.45$  in control (n.s.) (Fig. 4A and C). At the same time, neither amplitudes, nor rise or  
10 decay times of the mEPSC (Fig. 4 B2-4 and D2-4) differed among the groups, even though the peak  
11 incidence in dystonic tissue shifted from 6 to 8 pA after EPN-DBS (Fig. 4D1), while it remained at 7 pA  
12 in healthy tissue (Fig. 4B2) (for details on the values, see Table 2). EPN-DBS thus obviously dampens  
13 spontaneous presynaptic glutamate release at cortico-striatal synapses, and this again differentially  
14 stronger in dystonic than in healthy tissue.

## 15 **Neuronal properties**

16 Last, we were interested in the effect of EPN-DBS on the postsynaptic level, i.e. on cellular properties  
17 of medium spiny neurons receiving cortical input. We thus tested the firing properties of these  
18 neurons upon intracellular current injection at increasing strengths (Fig. 5 A, D), the so-called voltage  
19 sag presumably mediated by hyperpolarisation-activated, cyclic-nucleotide-modulated non selective  
20 (HCN) channels (which modulate excitability) (Fig. 5 B, E), as well as input resistance, membrane  
21 capacitance, resting membrane potential, rheobase and latency to first AP (which characteristically is  
22  $> 50$  ms in these neuron types) (box plots in Fig. 5C and F). There were no differences, neither  
23 between healthy (control) and dystonic ( $dt^{sz}$ ) tissue, as already reported before in this dystonia  
24 model [46], and actually also a mouse DYT1 model [52], nor between conditions without (sham) or

- 1 with EPN-DBS (DBS) (for details on the values, see Table 3). Hence, we can conclude that EPN-DBS
- 2 does not alter striatal medium spiny neuron properties.
- 3

## 1 **Discussion**

2 In this study we could show that DBS of the EPN for 3h in awake animals, which leads to alleviation of  
3 dystonic symptoms in mutant hamsters, which we could demonstrate recently [43], is associated  
4 with functional changes in cortico-striatal synaptic communication.

### 5 **Properties defining the dystonic condition:**

6 Studies in patients suggest that a pathological cortico-striatal function, and subsequent disturbance  
7 of striatal control of GPi, are likely to be important factors of dystonic dysfunction [1], possibly  
8 resulting in a shift of the balance toward the direct pathway [6]. In this sense, the animal models of  
9 dystonia, and in particular the dystonic *dt<sup>sz</sup>* mutant hamster, mirror this condition: It is spontaneously  
10 dystonic, and, as speculated for at least some human dystonias [3,4] [5], displays increased cortico-  
11 striatal excitability, as a result of reduced intra-striatal GABAergic signalling [35],[39]. This is  
12 corroborated by findings in humans, where reduced cortical and striatal inhibition were reported  
13 [53]. Even though there is an apparent in contrast to monogenetic dystonias such as DYT1 models,  
14 where GABAergic transmission was actually found to be reduced [52], the fact that instead inhibition  
15 via cholinergic interneurons was reverted to excitation in these models [54] also substantiates a  
16 deficit in inhibition, albeit via a different cell type. One can thus hypothesise that the dystonic  
17 phenotype arises from a functional shift in basal ganglia circuitry, which originates from a  
18 disinhibited striate body, which in turn results in a more prominent pallidal / entopeduncular  
19 inhibition as schematically shown in Fig. 6A.

### 20 **DBS alters cortico-striatal communication: synaptic efficacy**

21 Our experiments demonstrate that EPN-DBS increases cortico-striatal evoked compound synaptic  
22 potentials, but only from healthy, control animals. How does DBS then change this circuitry? From  
23 patient studies, comparatively few data exist on activity changes brought about by pallidal DBS  
24 within the basal ganglia network. Pallidal stimulation suppresses low-frequency activity in the  
25 pallidum itself, and this low-frequency activity is a persistent marker of disease severity [55]. In



1 addition, pallidal neurones react either with a persistent increase of activity, or with a sequence of  
2 events comprising initial increase, and prolonged decrease of spiking [56]. From a case study on one  
3 patient, we know that pallidal DBS in turn generates complex downstream effects on thalamic  
4 neuronal firing, with close to 48% of neurones showing a decrease in discharge frequency, and the  
5 rest an increase (8%) or no change (44%) [26]. Further downstream, pallidal DBS also seems to  
6 increase motor cortical inhibition [25]. Since there is both a thalamic, cortical and indeed pallidal,  
7 retrograde axonal connection to the striatum, effects on cortico-striatal communication have been  
8 speculated on [57], but have not been reported so far. Also animal studies do not directly address  
9 the question: Pallidal spiking changes have been confirmed in healthy rodent tissue in vitro, with the  
10 biphasic responses being attributed to cholinergic modulation [56]. Again, animal studies directly  
11 investigating cortico-striatal communication are lacking. We are hence left to speculate that the  
12 enhancing effect of EPN-DBS exclusively in healthy animals is related to the apparently differential  
13 effects on GABAergic tone (see below).

#### 14 **DBS alters striatal inhibitory tone**

15 In our study, we could show that EPN-DBS differentially affects inhibitory tone in healthy (relative  
16 reduction in tone) and dystonic tissue (relative increase in tone). This differential effect certainly is  
17 highly interesting, and could constitute one important factor in the mechanism of DBS. It is tempting  
18 to speculate that this inhibitory tone modulation results in a normalisation of the intrastriatal  
19 inhibition (which in dystonic tissue was shown to be abnormal) (Fig. 6B), although obviously we  
20 cannot rule out that also changes in feed-forward inhibition coming from the cortex contributes to  
21 this effect. Specifically, the observation that EPN-activity is reduced in *dt<sup>SZ</sup>* hamsters [35] is very likely  
22 due to striatal overactivity in dystonic animals, and previous findings showing that intrastriatal  
23 injection of GABA blockers worsen dystonia [58] also stress the pivotal role of intrastriatal GABAergic  
24 control. We therefore speculate that the inherent loss of parvalbumin-positive interneurons is  
25 functionally alleviated by DBS, but alternatively, also a possible pathological contribution of  
26 cholinergic interneurons being overactive and hence activating medium-spiny neurones [59] might

1 be normalised. At any rate, the paired-pulse experiments support this notion: facilitation reverted to  
2 depression in control sham, and DBS dystonic tissue under GABA block: Again, this corroborates that  
3 GABAergic tone controls synaptic transmission, and that EPN-DBS seems to reinstate a stronger  
4 GABAergic control on synaptic transmission in dystonic tissue, and that by contrast, DBS reduces this  
5 GABAergic containment in non-dystonic tissue. A caveat is that all these measurements are  
6 somewhat indirect – studies in the future thus have to address will have to disclose whether this  
7 effect is exerted directly, as known for dopaminergic synapses [60], or indirectly, by dissecting the  
8 different roles of local GABAergic and cholinergic interneurons, and feed-forward cortical inhibition.

### 9 **DBS alters spontaneous release in cortico-striatal synapses on medium spiny neurones**

10 A prominent effect of DBS in the current study is the decrease of mEPSC frequency in tissue from  
11 dystonic animals, and to a lesser degree from healthy animals having undergone EPN-DBS. From  
12 studies in dystonia, no reports are available on this phenomenon. However, the reaction bears  
13 similarities to an effect of very high frequency spinal cord stimulation, which reduces mEPSC  
14 frequency in lamina II dorsal horn neurones to normal values [61]. How is this effect mediated?  
15 Regarding our data on intrinsic properties of the postsynaptic, medium spiny neurones, which  
16 remained unaltered by EPN-DBS, a retrograde effect of the axons projecting to the EPN backfiring  
17 into the striate (as indicated by the arrow in Fig. 6B) is unlikely, although it cannot be fully excluded.  
18 A more plausible hypothesis would be that either direct thalamic projections to the striatum or  
19 indeed indirect projections via the pallido-thalamo-cortical loop are responsible. Again, these issues  
20 await exploration in the future by exploring thalamic and cortical changes.

21

1 **Tables**

2 **Table 1**

3 **Variability of evoked compound synaptic cortico-striatal potentials: Coefficient of variation**

| <b>dt<sup>SZ</sup></b>      |                              | <b>control</b>           |                          |
|-----------------------------|------------------------------|--------------------------|--------------------------|
| <b>sham</b>                 | <b>DBS</b>                   | <b>sham</b>              | <b>DBS</b>               |
| <b>12.7 ± 1.0</b><br>(n=11) | <b>12.7 ± 1.6</b><br>(n= 12) | <b>15.9 ± 1.4</b><br>n=6 | <b>13.9 ± 3.0</b><br>n=9 |

4 Values are means ± SEM

5 **Table 2**

6 **Characteristics of spontaneous miniature excitatory currents on medium-spiny neurons**

|                              | <b>dt<sup>SZ</sup></b> |                     | <b>control</b>      |                     |
|------------------------------|------------------------|---------------------|---------------------|---------------------|
|                              | <b>Sham</b><br>n=12    | <b>DBS</b><br>n=8   | <b>Sham</b><br>n=7  | <b>DBS</b><br>n=6   |
| <b>mEPSC frequency (HZ)</b>  | <b>4.11 ± 0.39</b>     | <b>2.15 ± 0.69</b>  | <b>3.18 ± 0.50</b>  | <b>1.70 ± 0.45</b>  |
| <b>mEPSC amplitude (pA)</b>  | <b>9.20 ± 0.56</b>     | <b>10.39 ± 0.82</b> | <b>10.68 ± 0.50</b> | <b>10.70 ± 1.22</b> |
| <b>mEPSC rise time (ms)</b>  | <b>3.18 ± 0.08</b>     | <b>3.26 ± 0.07</b>  | <b>3.17 ± 0.05</b>  | <b>3.42 ± 0.17</b>  |
| <b>mEPSC decay time (ms)</b> | <b>13.33 ± 0.75</b>    | <b>13.87 ± 0.66</b> | <b>14.14 ± 0.37</b> | <b>14.30 ± 0.17</b> |

7 Values are means ± SEM

8

1 **Table 3**

2 **Properties of medium spiny striatal neurones**

|                                                           | <b>dt<sup>sz</sup></b>      |                             | <b>control</b>             |                            |
|-----------------------------------------------------------|-----------------------------|-----------------------------|----------------------------|----------------------------|
|                                                           | <b>Sham</b>                 | <b>DBS</b>                  | <b>Sham</b>                | <b>DBS</b>                 |
| <b>maximum no. of AP (at 300 pA)</b>                      | <b>4.0 ± 1.0</b><br>n=10    | <b>5.1 ± 1.6</b><br>n=13    | <b>8.13 ± 2.18</b><br>n=8  | <b>7.00 ± 1.90</b><br>n=6  |
| <b>maximum of voltage sag amplitude (at -300 pA) (mV)</b> | <b>1.96 ± 0.37</b><br>n=14  | <b>1.93 ± 0.39</b><br>n=22  | <b>1.31 ± 0.20</b><br>n=7  | <b>1.83 ± 0.43</b><br>n=6  |
| <b>input resistance (MΩ)</b>                              | <b>142.5 ± 15.6</b><br>n=24 | <b>185.5 ± 28.9</b><br>n=20 | <b>177.2 ± 25.2</b><br>n=8 | <b>197.5 ± 52.5</b><br>n=6 |
| <b>membrane capacitance (pF)</b>                          | <b>76.1 ± 5.6</b><br>n=23   | <b>82.9 ± 4.2</b><br>n=20   | <b>95.67 ± 7.33</b><br>n=8 | <b>95.52 ± 7.05</b><br>n=6 |
| <b>resting membrane potential (mV)</b>                    | <b>-72.6 ± 1.1</b><br>n=22  | <b>-71.1 ± 1.7</b><br>n=20  | <b>-73.5 ± 1.7</b><br>n=8  | <b>-70.8 ± 1.21</b><br>n=6 |
| <b>rheobase (pA)</b>                                      | <b>260.0 ± 26.8</b><br>n=20 | <b>203.1 ± 35.8</b><br>n=16 | <b>157.1 ± 42.2</b><br>n=8 | <b>158.3 ± 27.4</b><br>n=6 |
| <b>Latency of 1<sup>st</sup> AP (ms)</b>                  | <b>212.2 ± 47.0</b><br>n=13 | <b>176.8 ± 36.6</b><br>n=14 | <b>185.3 ± 44.6</b><br>n=8 | <b>145.1 ± 42.6</b><br>n=6 |

3 Values are means ± SEM

4

1 **Acknowledgement**

2 We are grateful for the excellent technical assistance and animal keeping respectively of Tina  
3 Sellmann , Imke Reich, Hanka Schmidt and Silke Birkmann.

4

5 **Funding**

6 This research was funded by the Deutsche Forschungsgemeinschaft (DFG, German Research  
7 Foundation) – SFB 1270/1 – 299150580.

8

9 **Declarations of interest:**

10 The authors declare that there are no conflicts of interest.

11

12 Author contributions:

13 RK and AR designed the study, FP, CN and DT designed and constructed the DBS stimulator,  
14 MP,DF,FP,CN,DT,CB and UvR proposed the layout of the stimulator features, FP,CN,DT as well as MZ,  
15 DF, VN, MP, SP, AL, AR and RK tested it in pilot conditions, MH, MZ, and DF conducted in vivo DBS for  
16 this study, and conducted the electrophysiological experiments, MZ,MH,DF and RK wrote the paper  
17 and all authors contributed to discussion of the manuscript.

18

19

20

21

## 1 **Figure Legends**

2 **Figure 1 Slice generation and electrode placement.** A: Illustration of brain preparation after removal  
3 from skull. Top: The position of the SNEX-100 DBS-electrode is given schematically; before slicing; the  
4 electrode was removed gently. To obtain angulated slices, and thus to preserve cortico-striatal  
5 projections, the dorsal part of the cortex and cerebellum were removed at the 40° angle as indicated  
6 by the scissors pictogram. Bottom: After angulation, horizontal cuts of the brain were performed to  
7 obtain 400 µm slices as indicated by parallel arrows. B: Photograph of a brain slice, prepared as  
8 described in the slice preparation section, containing the motor cortex and striatum, with  
9 connections between these two regions still intact. For *in vitro* recordings, the field potential  
10 recording electrode was placed in the dorso-medial part of the striatum, and the extracellular  
11 stimulating electrode (lightning arrow) was placed in the white matter of the adjacent neocortex, as  
12 indicated. Again, the virtual position of the SNEX-100 DBS electrode (now explanted) is indicated on  
13 the slice.

14

15 **Figure 2 DBS enhances synaptic efficiency in control, but not in the dystonic groups.** A: The dot plot  
16 shows the effect of DBS on input-output behaviour in the cortico-striatal network. Average data of  
17 pooled fEPSP slopes in response to increasing stimulating of the four experimental groups are  
18 indicated by dots and slashed lines. Data are presented as mean ± SEM of stimulated (filled symbols)  
19 and sham-stimulated (empty symbols) control (triangles) and *dt<sup>SZ</sup>* hamsters (circles). The number of  
20 slices is given in parentheses (in each experiment, usually only one slice per animal was obtained).  
21 Asterisks indicate significant differences ( $p < 0.01$ ; ANOVA). Representative traces (top) illustrate  
22 series of fEPSP in response to increasing stimulus strengths of the respective groups as indicated. B:  
23 Box and whisker plot of paired-pulse ratio (PPR) of evoked field potential slopes in *dt<sup>SZ</sup>* and control  
24 slices, without DBS (sham), and after EPN-DBS (DBS). A PPR > 1 demonstrates facilitation, and <1  
25 depression of the second of a pair of responses evoked at an interval of 40 ms. Medians: straight

1 lines, means: hashed lines. Single dots represent means of one experiment (slice). **C:** Box and  
2 whisker plot of coefficient of variation of evoked field potential slopes in *dt<sup>sz</sup>* and control slices,  
3 without DBS (sham), and after EPN-DBS (DBS). Means: straight lines, medians: hashed lines. Single  
4 dots represent means of one experiment (slice).

5

6 **Figure 3 DBS specifically increases striatal inhibitory tone in dystonic animals, and decreases it in**  
7 **non-dystonic hamsters. A, B:** The dot plots show the effect of DBS on cortico-striatal synaptic  
8 transmission under GABA-receptor blockade using gabazine (5  $\mu$ M) from time-point 0, as indicated,  
9 after 20 min of stable baseline conditions. The data points represent cumulative means of relative  
10 fEPSP changes as percentage of baseline values before GABA-receptor block. Relative increases of  
11 fEPSP slope under GABA-receptor block hence indicate degree of inhibitory tone controlling synaptic  
12 transmission. fEPSP slopes were measured at 50% saturating stimulus intensity. Data are presented  
13 as mean  $\pm$  SEM of EPN-DBS stimulated (filled symbols) and sham-stimulated (empty symbols) in *dt<sup>sz</sup>*  
14 **(A)** and control hamsters **(B)**. The number of slices is given in parentheses. Asterisks indicate  
15 significant differences ( $p < 0.05$ ; two-way repeated measurement ANOVA) and refer to comparisons  
16 of EPN-DBS stimulated (DBS) and sham-stimulated (sham) animals. **C:** Representative traces illustrate  
17 fEPSP in slices of *dt<sup>sz</sup>* and control animals within the first (fine trace, baseline,  $t = -20$  to  $-15$  min) and  
18 last five min (bold trace, gabazine,  $t = 55$  to  $60$  min) of the measurement. **D:** Box and whisker plot of  
19 changes of paired-pulse ratio (PPR) after GABA<sub>A</sub>-receptor block (gabazine) coefficient of variation of  
20 evoked field potential slopes in *dt<sup>sz</sup>* and control slices, without DBS (sham), and after EPN-DBS (DBS).  
21 In all plots, filled symbols represent data from animals having undergone EPN-DBS, open symbols  
22 those of animals with sham stimulation only. In all box plots, medians are represented by straight  
23 lines and means by dashed lines. Single dots represent means of one experiment (slice).

24

1 **Figure 4 DBS decreases miniature EPSC (mEPSC) occurring spontaneously at the cortico-striatal**  
2 **synapse of medium spiny neurones.** Original traces (**A1, C1**) of mEPSCs recorded from medium spiny  
3 neurones in dt<sup>sz</sup> (**A**) and control (**C**) slices from animals having undergone EPN-DBS (DBS) or sham  
4 stimulation (sham). Corresponding cumulative probability histograms (**A2, C2**) as well as box and  
5 whisker plots (**A3, C3**) of the same groups (sham: light curves and open box plots, dt<sup>sz</sup>: dark curves  
6 and filled boxes) show that DBS reduces frequency of mEPSC, with a significant reduction in dystonic  
7 tissue (asterisk in A3, p<0.05, MWRS test). By contrast, amplitudes of mEPSC are not altered by DBS  
8 with respect to sham stimulation in either dystonic (dt<sup>sz</sup>, **B**) or control slices (control, **D**), as illustrated  
9 by amplitude distribution histograms (**B1, D1**), as well as box and whisker plots of mean mEPSC  
10 amplitudes (**B2, D2**). Neither are there any differences among the groups regarding the kinetics of  
11 mEPSC, as illustrated in the box and whisker plots of mEPSC mean rise (**A3, D3**) and decay (**A4, D4**)  
12 times. In all plots, filled symbols represent data from animals having undergone EPN-DBS, open  
13 symbols those of animals with sham stimulation only. In all box plots, medians are represented by  
14 straight lines and means by dashed lines. Single dots represent means of one experiment (slice).

15

16 **Figure 5 DBS does not influence intrinsic neuronal properties of medium spiny neurones.** Original  
17 traces of membrane potential recordings illustrating firing properties (**A, D**) of medium spiny  
18 neurones in dt<sup>sz</sup> (**A**) and control (**D**) slices from animals having undergone EPN-DBS (DBS) or sham  
19 stimulation (sham). Firing was elicited by depolarising current injection at increasing amplitudes  
20 (inset left). The corresponding input-output curve is displayed below the original traces, as dot  
21 diagram of action potential number plotted against current injection. Original traces of membrane  
22 potential recordings illustrating voltage sag (**B, E**) of medium spiny neurones in dystonic (dt<sup>sz</sup>, **A**) and  
23 control (**D**) slices from animals having undergone EPN-DBS (DBS) or sham stimulation (sham). Voltage  
24 sag representing hyperpolarisation-activated, cyclic-nucleotide gated, non-selective (HCN) channel  
25 activation was elicited by hyperpolarising current injection at increasing amplitudes (inset left). The  
26 corresponding input-output curve is displayed below the original traces, as dot diagram of voltage



1 change in depolarising direction plotted against current injection. **C, F**: Box and whisker plots of input  
2 resistance (**C1, F1**), membrane capacitance (**C2, F2**), resting membrane potential (**C3, F3**), rheobase  
3 (**C4, F4**) and latency to first action potential after depolarising current injection (**C5, F5**) in tissue from  
4 dystonic (**C**) and control (**F**) animals. In all plots, filled symbols represent data from animals having  
5 undergone EPN-DBS, open symbols those of animals with sham stimulation only. In all box plots,  
6 means are represented by straight lines and medians by dashed lines. Single dots represent means of  
7 one experiment (slice). In all plots, filled symbols represent data from animals having undergone  
8 EPN-DBS, open symbols those of animals with sham stimulation only. In all box plots, medians are  
9 represented by straight lines and means by dashed lines. Single dots represent means of one  
10 experiment (slice).

11

12 **Figure 5 Hypothetical effect of DBS on basal ganglia circuitry.** The graph shows a schematic and  
13 reduced representation of basal ganglia circuitry under dystonic conditions before (A) and after DBS  
14 (B). A: Previous findings in animal dystonia [35,42] models and data from human studies [13] suggest a  
15 loss of inhibitory tone within the striatal network, possibly based on a reduction of interneurone  
16 function, which at least in the *dt<sup>sz</sup>* hamster has been documented by transient loss of parvalbumin-  
17 positive interneurons [35]. We hypothesise that this leads to a disinhibition within the striatum (red  
18 hatching), and hence a more prominent inhibitory projection onto the GPi (bold lines in blue). B: We  
19 hypothesise that DBS (red lightning arrow) normalises this state, possibly via activating backfiring  
20 axons into the Striate (dotted light grey arrow), or more likely via anterograde signalling via thalamic  
21 projections onto striatum or pallido-thalamo-cortical loop (dark grey arrows).

22

1 **Highlights**

2

- 3       • Pallidal DBS was applied in an animal model of dystonia in freely moving animals for 3h
- 4       • Persistent effects on cortico-striatal synaptic communication were observed
- 5       • DBS increased striatal inhibitory tone in dystonic, and decreased it in non-dystonic tissue.
- 6       • DBS further leads to reduction of spontaneous excitatory cortico-striatal activity in dystonic
- 7       tissue.
- 8       • We hypothesise that these DBS effects are probably mediated by presynaptic modulation of
- 9       cortical afferents.

10

11

12

Reference List

- 1  
2
- 3 [1] Berardelli A, Rothwell JC, Hallett M, Thompson PD, Manfredi M et al. The pathophysiology of  
4 primary dystonia. *Brain* 1998; 121 ( Pt 7):1195-1212.
- 5 [2] Marsden CD, Harrison MJ, Bunday S. Natural history of idiopathic torsion dystonia. *Adv*  
6 *Neurol* 1976; 14:177-187.
- 7 [3] Quartarone A, Hallett M. Emerging concepts in the physiological basis of dystonia. *Mov*  
8 *Disord* 2013; 28:958-967. 10.1002/mds.25532 [doi].
- 9 [4] Quartarone A, Pisani A. Abnormal plasticity in dystonia: Disruption of synaptic homeostasis.  
10 *Neurobiol Dis* 2011; 42:162-170.
- 11 [5] Schirinzi T, Sciamanna G, Mercuri NB, Pisani A. Dystonia as a network disorder: a concept in  
12 evolution. *Curr Opin Neurol* 2018; 31:498-503. 10.1097/WCO.0000000000000580  
13 [doi].
- 14 [6] Wichmann T, Dostrovsky JO. Pathological basal ganglia activity in movement disorders.  
15 *Neuroscience* 2011; 198:232-244. S0306-4522(11)00732-9  
16 [pii];10.1016/j.neuroscience.2011.06.048 [doi].
- 17 [7] Meunier S, Rusmann H, Shamim E, Lamy JC, Hallett M. Plasticity of cortical inhibition in  
18 dystonia is impaired after motor learning and paired-associative stimulation. *Eur J*  
19 *Neurosci* 2012; 35:975-986. 10.1111/j.1460-9568.2012.08034.x [doi].
- 20 [8] Beck S, Hallett M. Surround inhibition in the motor system. *Exp Brain Res* 2011; 210:165-172.  
21 10.1007/s00221-011-2610-6 [doi].
- 22 [9] Beck S, Shamim EA, Richardson SP, Schubert M, Hallett M. Inter-hemispheric inhibition is  
23 impaired in mirror dystonia. *Eur J Neurosci* 2009; 29:1634-1640. EJN6710  
24 [pii];10.1111/j.1460-9568.2009.06710.x [doi].
- 25 [10] Crowell AL, Ryapolova-Webb ES, Ostrem JL, Galifianakis NB, Shimamoto S et al. Oscillations in  
26 sensorimotor cortex in movement disorders: an electrocorticography study. *Brain*  
27 2012; 135:615-630. awr332 [pii];10.1093/brain/awr332 [doi].
- 28 [11] Kuhn AA, Brucke C, Schneider GH, Trottenberg T, Kivi A et al. Increased beta activity in  
29 dystonia patients after drug-induced dopamine deficiency. *Exp Neurol* 2008;  
30 214:140-143. S0014-4886(08)00305-1 [pii];10.1016/j.expneurol.2008.07.023 [doi].
- 31 [12] Silberstein P, Kuhn AA, Kupsch A, Trottenberg T, Krauss JK et al. Patterning of globus pallidus  
32 local field potentials differs between Parkinson's disease and dystonia. *Brain* 2003;  
33 126:2597-2608. 10.1093/brain/awg267 [doi];awg267 [pii].
- 34 [13] Tisch S, Rothwell JC, Bhatia KP, Quinn N, Zrinzo L et al. Pallidal stimulation modifies after-  
35 effects of paired associative stimulation on motor cortex excitability in primary  
36 generalised dystonia. *Exp Neurol* 2007; 206:80-85. S0014-4886(07)00139-2  
37 [pii];10.1016/j.expneurol.2007.03.027 [doi].
- 38 [14] Balint B, Mencacci NE, Valente EM, Pisani A, Rothwell J et al. Dystonia. *Nat Rev Dis Primers*  
39 2018; 4:25. 10.1038/s41572-018-0023-6 [doi];10.1038/s41572-018-0023-6 [pii].

- 1 [15] Prudente CN, Hess EJ, Jinnah HA. Dystonia as a network disorder: what is the role of the  
2 cerebellum? *Neuroscience* 2014; 260:23-35. S0306-4522(13)01009-9  
3 [pii];10.1016/j.neuroscience.2013.11.062 [doi].
- 4 [16] Krack P, Volkmann J, Tinkhauser G, Deuschl G. Deep Brain Stimulation in Movement  
5 Disorders: From Experimental Surgery to Evidence-Based Therapy. *Mov Disord* 2019;  
6 34:1795-1810. 10.1002/mds.27860 [doi].
- 7 [17] Volkmann J, Mueller J, Deuschl G, Kuhn AA, Krauss JK et al. Pallidal neurostimulation in  
8 patients with medication-refractory cervical dystonia: a randomised, sham-  
9 controlled trial. *Lancet Neurol* 2014; 13:875-884. S1474-4422(14)70143-7  
10 [pii];10.1016/S1474-4422(14)70143-7 [doi].
- 11 [18] Volkmann J, Wolters A, Kupsch A, Muller J, Kuhn AA et al. Pallidal deep brain stimulation in  
12 patients with primary generalised or segmental dystonia: 5-year follow-up of a  
13 randomised trial. *Lancet Neurol* 2012; 11:1029-1038. S1474-4422(12)70257-0  
14 [pii];10.1016/S1474-4422(12)70257-0 [doi].
- 15 [19] Udupa K, Chen R. The mechanisms of action of deep brain stimulation and ideas for the  
16 future development. *Prog Neurobiol* 2015; 133:27-49. S0301-0082(15)00088-X  
17 [pii];10.1016/j.pneurobio.2015.08.001 [doi].
- 18 [20] Herrington TM, Cheng JJ, Eskandar EN. Mechanisms of deep brain stimulation. *J Neurophysiol*  
19 2016; 115:19-38. jn.00281.2015 [pii];10.1152/jn.00281.2015 [doi].
- 20 [21] Kuhn AA, Kupsch A, Schneider GH, Brown P. Reduction in subthalamic 8-35 Hz oscillatory  
21 activity correlates with clinical improvement in Parkinson's disease. *Eur J Neurosci*  
22 2006; 23:1956-1960. EJM4717 [pii];10.1111/j.1460-9568.2006.04717.x [doi].
- 23 [22] Quinn EJ, Blumenfeld Z, Velisar A, Koop MM, Shreve LA et al. Beta oscillations in freely  
24 moving Parkinson's subjects are attenuated during deep brain stimulation. *Mov*  
25 *Disord* 2015; 30:1750-1758. 10.1002/mds.26376 [doi].
- 26 [23] Ruge D, Tisch S, Hariz MI, Zrinzo L, Bhatia KP et al. Deep brain stimulation effects in dystonia:  
27 time course of electrophysiological changes in early treatment. *Mov Disord* 2011;  
28 26:1913-1921. 10.1002/mds.23731 [doi].
- 29 [24] Tisch S, Rothwell JC, Limousin P, Hariz MI, Corcos DM. The physiological effects of pallidal  
30 deep brain stimulation in dystonia. *IEEE Trans Neural Syst Rehabil Eng* 2007; 15:166-  
31 172. 10.1109/TNSRE.2007.896994 [doi].
- 32 [25] Bocek V, Stetkarova I, Fecikova A, Cejka V, Urgosik D et al. Pallidal stimulation in dystonia  
33 affects cortical but not spinal inhibitory mechanisms. *J Neurol Sci* 2016; 369:19-26.  
34 S0022-510X(16)30466-X [pii];10.1016/j.jns.2016.07.053 [doi].
- 35 [26] Montgomery EB, Jr. Effects of GPi stimulation on human thalamic neuronal activity. *Clin*  
36 *Neurophysiol* 2006; 117:2691-2702. S1388-2457(06)01426-X  
37 [pii];10.1016/j.clinph.2006.08.011 [doi].
- 38 [27] Chiken S, Nambu A. High-frequency pallidal stimulation disrupts information flow through  
39 the pallidum by GABAergic inhibition. *J Neurosci* 2013; 33:2268-2280. 33/6/2268  
40 [pii];10.1523/JNEUROSCI.4144-11.2013 [doi].

- 1 [28] Luo F, Kiss ZH. Cholinergic mechanisms of high-frequency stimulation in entopeduncular  
2 nucleus. *J Neurophysiol* 2016; 115:60-67. jn.00269.2015 [pii];10.1152/jn.00269.2015  
3 [doi].
- 4 [29] Leblois A, Reese R, Labarre D, Hamann M, Richter A et al. Deep brain stimulation changes  
5 basal ganglia output nuclei firing pattern in the dystonic hamster. *Neurobiol Dis*  
6 2010; 38:288-298. S0969-9961(10)00036-7 [pii];10.1016/j.nbd.2010.01.020 [doi].
- 7 [30] Reese R, Charron G, Nadjar A, Aubert I, Thiolat ML et al. High frequency stimulation of the  
8 entopeduncular nucleus sets the cortico-basal ganglia network to a new functional  
9 state in the dystonic hamster. *Neurobiol Dis* 2009; 35:399-405. S0969-  
10 9961(09)00136-3 [pii];10.1016/j.nbd.2009.05.022 [doi].
- 11 [31] Harnack D, Hamann M, Meissner W, Morgenstern R, Kupsch A et al. High-frequency  
12 stimulation of the entopeduncular nucleus improves dystonia in dt(s) hamsters.  
13 *Neuroreport* 2004; 15:1391-1393. 00001756-200406280-00004 [pii].
- 14 [32] Paasonen J, Stenroos P, Salo RA, Kiviniemi V, Grohn O. Functional connectivity under six  
15 anesthesia protocols and the awake condition in rat brain. *Neuroimage* 2018; 172:9-  
16 20. S1053-8119(18)30016-8 [pii];10.1016/j.neuroimage.2018.01.014 [doi].
- 17 [33] Bode C, Richter F, Sprote C, Brigadski T, Bauer A et al. Altered postnatal maturation of striatal  
18 GABAergic interneurons in a phenotypic animal model of dystonia. *Exp Neurol* 2017;  
19 287:44-53. S0014-4886(16)30344-2 [pii];10.1016/j.expneurol.2016.10.013 [doi].
- 20 [34] Gernert M, Richter A, Löscher W. Alterations in spontaneous single unit activity of striatal  
21 subdivisions during ontogenesis in mutant dystonic hamsters. *Brain Res* 1999;  
22 821:277-285.
- 23 [35] Gernert M, Hamann M, Bennay M, Löscher W, Richter A. Deficit of Striatal Parvalbumin-  
24 Reactive GABAergic Interneurons and Decreased Basal Ganglia Output in a Genetic  
25 Rodent Model of Idiopathic Paroxysmal Dystonia. *The Journal of Neuroscience* 2000;  
26 20:7052-7058.
- 27 [36] Hamann M, Richter A, Meillasson FV, Nitsch C, Ebert U. Age-related changes in parvalbumin-  
28 positive interneurons in the striatum, but not in the sensorimotor cortex in dystonic  
29 brains of the dt(s) mutant hamster. *Brain Res* 2007; 1150:190-199.
- 30 [37] Richter A, Löscher W. Pathophysiology of Idiopathic Dystonia: Findings from Genetic Animal  
31 Models. *Progress in Neurobiology* 1998; 54:633-677.
- 32 [38] Richter F, Richter A. Genetic animal models of dystonia: Common features and diversities.  
33 *Prog Neurobiol* 2014. S0301-0082(14)00074-4 [pii];10.1016/j.pneurobio.2014.07.002  
34 [doi].
- 35 [39] Avchalumov Y, Volkman CE, Ruckborn K, Hamann M, Kirschstein T et al. Persistent changes  
36 of corticostriatal plasticity in dt(s) mutant hamsters after age-dependent remission  
37 of dystonia. *Neuroscience* 2013; 250:60-69. S0306-4522(13)00554-X  
38 [pii];10.1016/j.neuroscience.2013.06.048 [doi].
- 39 [40] Gernert M, Thompson KW, Löscher W, Tobin AJ (2002) Genetically Engineered GABA-  
40 Producing Cells Demonstrate Anticonvulsant Effects and Long-Term Transgene  
41 Expression when Transplanted into the Central Piriform Cortex of Rats. *Exp Neurol*  
42 176: 183-192.

- 1 [41] DeSimone JC, Febo M, Shukla P, Ofori E, Colon-Perez LM et al. In vivo imaging reveals  
2 impaired connectivity across cortical and subcortical networks in a mouse model of  
3 DYT1 dystonia. *Neurobiol Dis* 2016; 95:35-45. S0969-9961(16)30163-2  
4 [pii];10.1016/j.nbd.2016.07.005 [doi].
- 5 [42] Chiken S, Shashidharan P, Nambu A. Cortically evoked long-lasting inhibition of pallidal  
6 neurons in a transgenic mouse model of dystonia. *J Neurosci* 2008; 28:13967-13977.  
7 28/51/13967 [pii];10.1523/JNEUROSCI.3834-08.2008 [doi].
- 8 [43] Paap M, Perl S, Lüttig A, Plocksties F, Niemann C, Timmermann D, Bahls C, van Rienen U,  
9 Franz D, Zwar M, Rohde M, Köhling R, Richter A (2020) Deep brain stimulation as a  
10 therapeutic option in dystonia: effects of different frequencies in a phenotypic  
11 animal model by using an optimized stimulator. *Naunyn-Schmiedeberg's Arch*  
12 *Pharmacol* 393: S72.
- 13 [44] Morin LP, Wood RI. A stereotaxic atlas of the golden hamster brain. San Diego, London:  
14 Academic Press; 2000.
- 15 [45] Avshalumov Y, Sander SE, Richter F, Porath K, Hamann M et al. Role of striatal NMDA  
16 receptor subunits in a model of paroxysmal dystonia. *Exp Neurol* 2014. S0014-  
17 4886(14)00264-7 [pii];10.1016/j.expneurol.2014.08.012 [doi].
- 18 [46] Köhling R, Koch UR, Hamann M, Richter A. Increased excitability in cortico-striatal synaptic  
19 pathway in a model of paroxysmal dystonia. *Neurobiology of Disease* 2004; 16:236-  
20 245.
- 21 [47] Ashkan K, Rogers P, Bergman H, Ughratdar I. Insights into the mechanisms of deep brain  
22 stimulation. *Nat Rev Neurol* 2017; 13:548-554. nrneurol.2017.105  
23 [pii];10.1038/nrneurol.2017.105 [doi].
- 24 [48] Chiken S, Nambu A. Mechanism of Deep Brain Stimulation: Inhibition, Excitation, or  
25 Disruption? *Neuroscientist* 2016; 22:313-322. 1073858415581986  
26 [pii];10.1177/1073858415581986 [doi].
- 27 [49] Kirischuk S, Veselovsky N, Grantyn R. Relationship between presynaptic calcium transients  
28 and postsynaptic currents at single *gamma*-aminobutyric acid (GABA)ergic boutons.  
29 *Proc Natl Acad Sci USA* 1999; 96:7520-7525.
- 30 [50] Dittman JS, Regehr WG. Contributions of calcium-dependent and calcium-independent  
31 mechanisms to presynaptic inhibition at a cerebellar synapse. *J Neurosci* 1996;  
32 16:1623-1633.
- 33 [51] Dittman JS, Kreitzer AC, Regehr WG. Interplay between facilitation, depression, and residual  
34 calcium at three presynaptic terminals. *J Neurosci* 2000; 20:1374-1385.
- 35 [52] Sciamanna G, Bonsi P, Tassone A, Cuomo D, Tscherter A et al. Impaired striatal D2 receptor  
36 function leads to enhanced GABA transmission in a mouse model of DYT1 dystonia.  
37 *Neurobiol Dis* 2009.
- 38 [53] Levy LM, Hallett M. Impaired brain GABA in focal dystonia. *Ann Neurol* 2002; 51:93-101.  
39 10.1002/ana.10073 [pii].

- 1 [54] Martella G, Maltese M, Nistico R, Schirinzi T, Madeo G et al. Regional specificity of synaptic  
2 plasticity deficits in a knock-in mouse model of DYT1 dystonia. *Neurobiol Dis* 2014;  
3 65:124-132. S0969-9961(14)00030-8 [pii];10.1016/j.nbd.2014.01.016 [doi].
- 4 [55] Scheller U, Lofredi R, van Wijk BCM, Saryyeva A, Krauss JK et al. Pallidal low-frequency  
5 activity in dystonia after cessation of long-term deep brain stimulation. *Mov Disord*  
6 2019; 34:1734-1739. 10.1002/mds.27838 [doi].
- 7 [56] Luo F, Kim LH, Magown P, Noor MS, Kiss ZHT. Long-Lasting Electrophysiological After-Effects  
8 of High-Frequency Stimulation in the Globus Pallidus: Human and Rodent Slice  
9 Studies. *J Neurosci* 2018; 38:10734-10746. JNEUROSCI.0785-18.2018  
10 [pii];10.1523/JNEUROSCI.0785-18.2018 [doi].
- 11 [57] Dostrovsky JO, Levy R, Wu JP, Hutchison WD, Tasker RR et al. Microstimulation-induced  
12 inhibition of neuronal firing in human globus pallidus. *J Neurophysiol* 2000; 84:570-  
13 574. 10.1152/jn.2000.84.1.570 [doi].
- 14 [58] Hamann M, Richter A. Effects of striatal injections of GABA(A) receptor agonists and  
15 antagonists in a genetic animal model of paroxysmal dystonia. *Eur J Pharmacol* 2002;  
16 443:59-70. S0014299902015467 [pii];10.1016/s0014-2999(02)01546-7 [doi].
- 17 [59] Eskow Jaunarajs KL, Bonsi P, Chesselet MF, Standaert DG, Pisani A. Striatal cholinergic  
18 dysfunction as a unifying theme in the pathophysiology of dystonia. *Prog Neurobiol*  
19 2015; 127-128:91-107. S0301-0082(15)00011-8  
20 [pii];10.1016/j.pneurobio.2015.02.002 [doi].
- 21 [60] Lavoute C, Weiss M, Rostain JC. The role of NMDA and GABAA receptors in the inhibiting  
22 effect of 3 MPa nitrogen on striatal dopamine level. *Brain Res* 2007; 1176:37-44.  
23 S0006-8993(07)01663-0 [pii];10.1016/j.brainres.2007.07.085 [doi].
- 24 [61] Liao WT, Tseng CC, Chia WT, Lin CR. High-frequency spinal cord stimulation treatment  
25 attenuates the increase in spinal glutamate release and spinal miniature excitatory  
26 postsynaptic currents in rats with spared nerve injury-induced neuropathic pain.  
27 *Brain Res Bull* 2020; 164:307-313. S0361-9230(20)30627-4  
28 [pii];10.1016/j.brainresbull.2020.09.005 [doi].  
29  
30

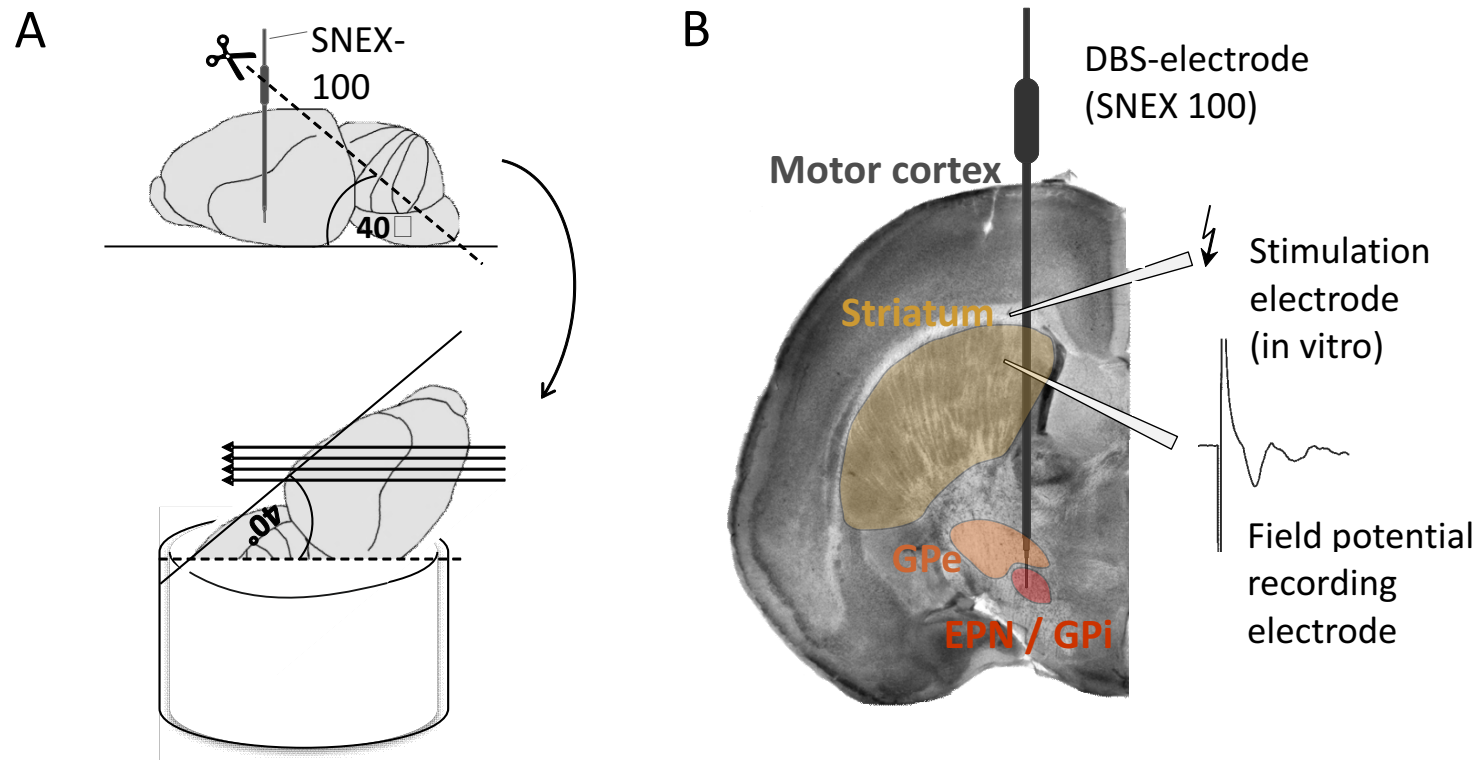

Fig. 1



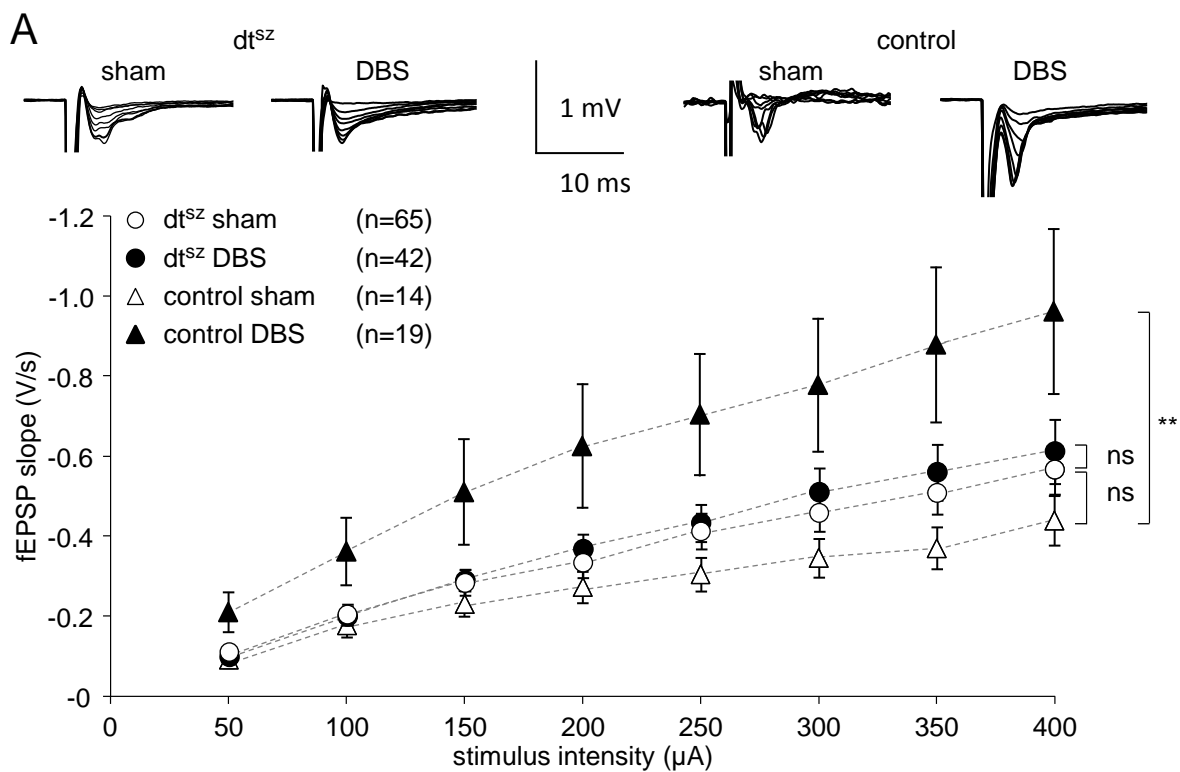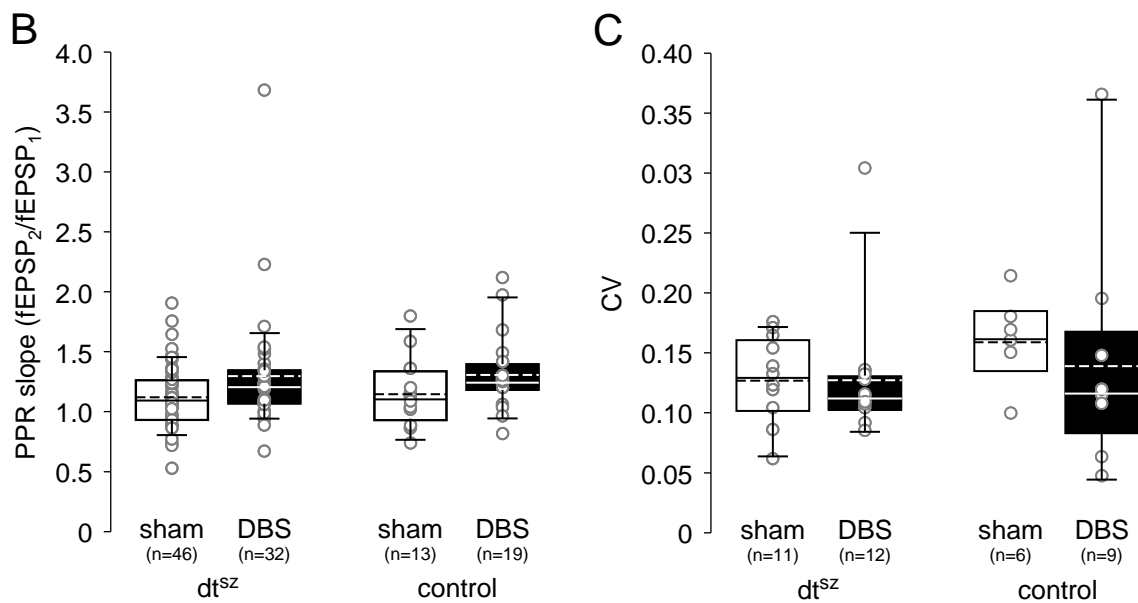

Fig. 2

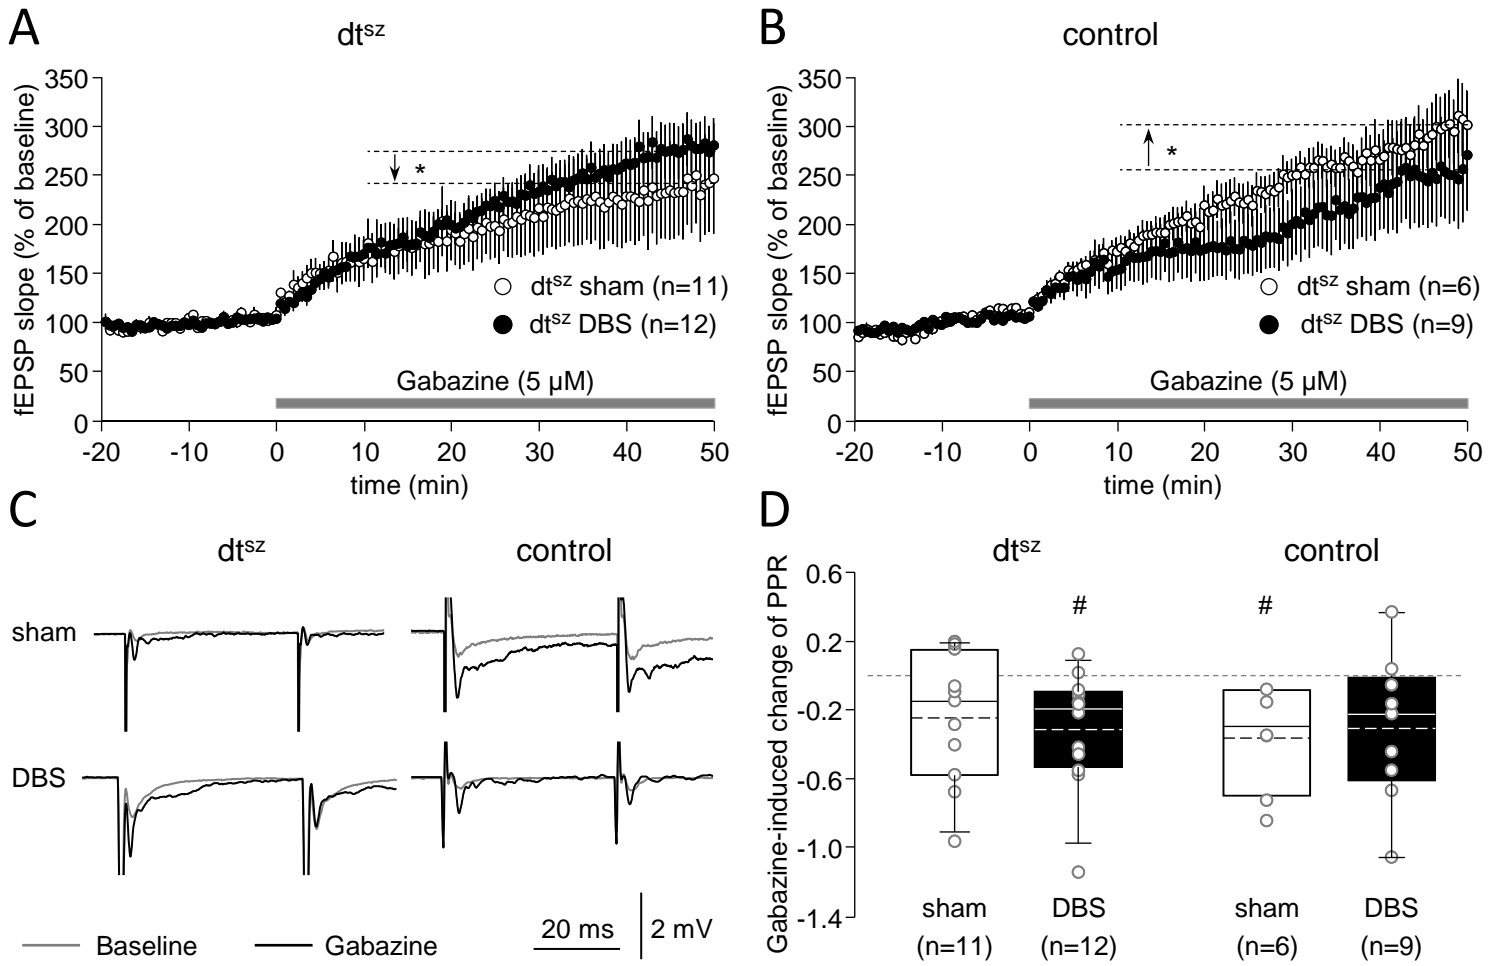

Fig. 3

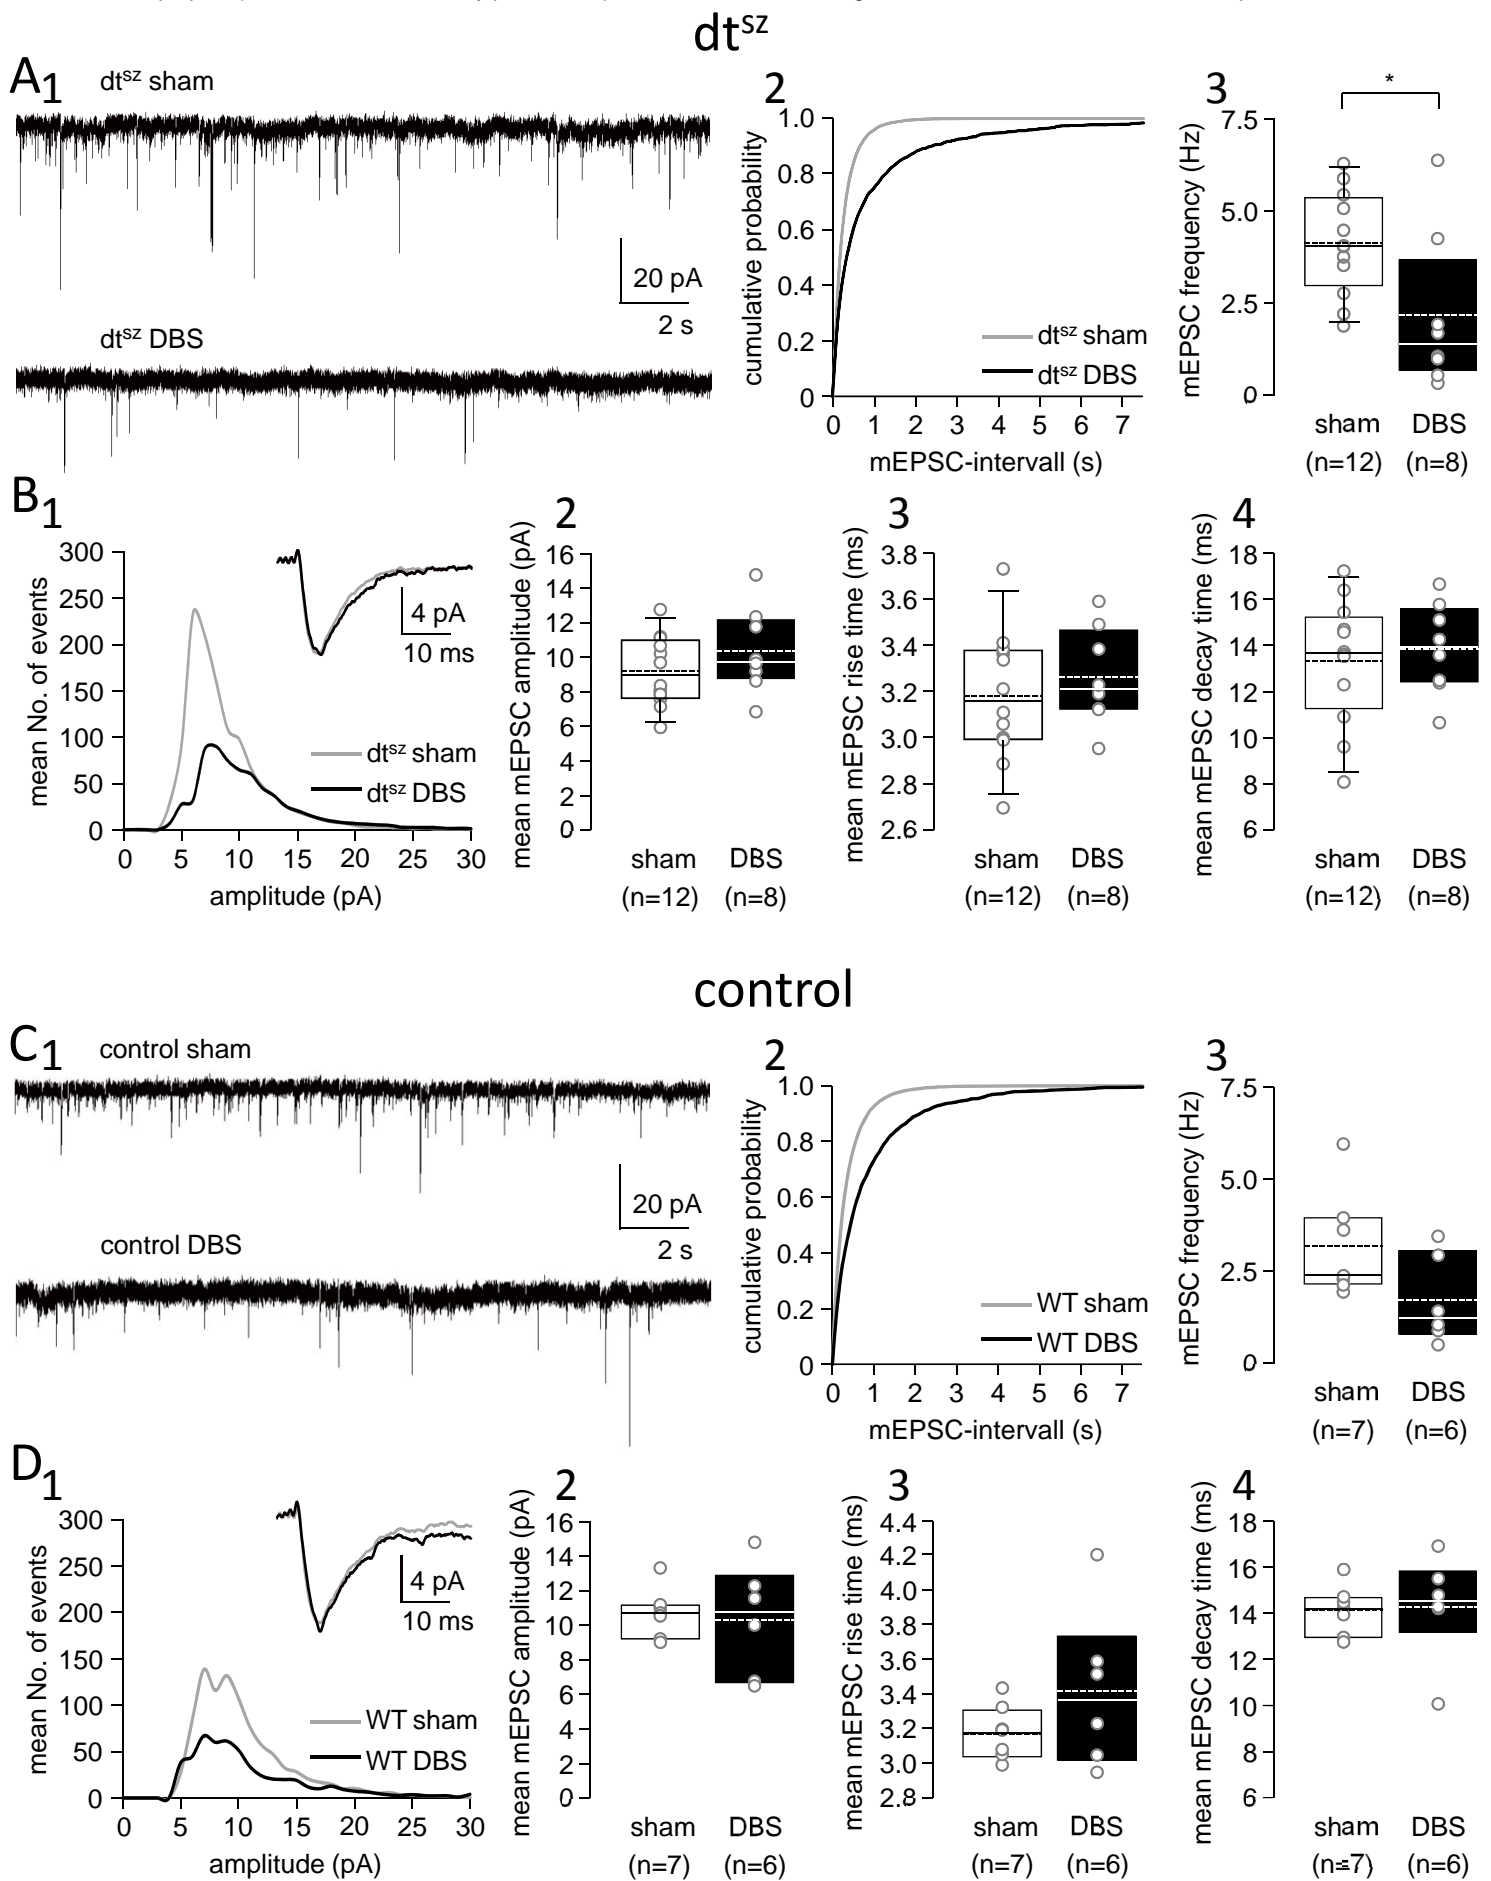

Fig. 4

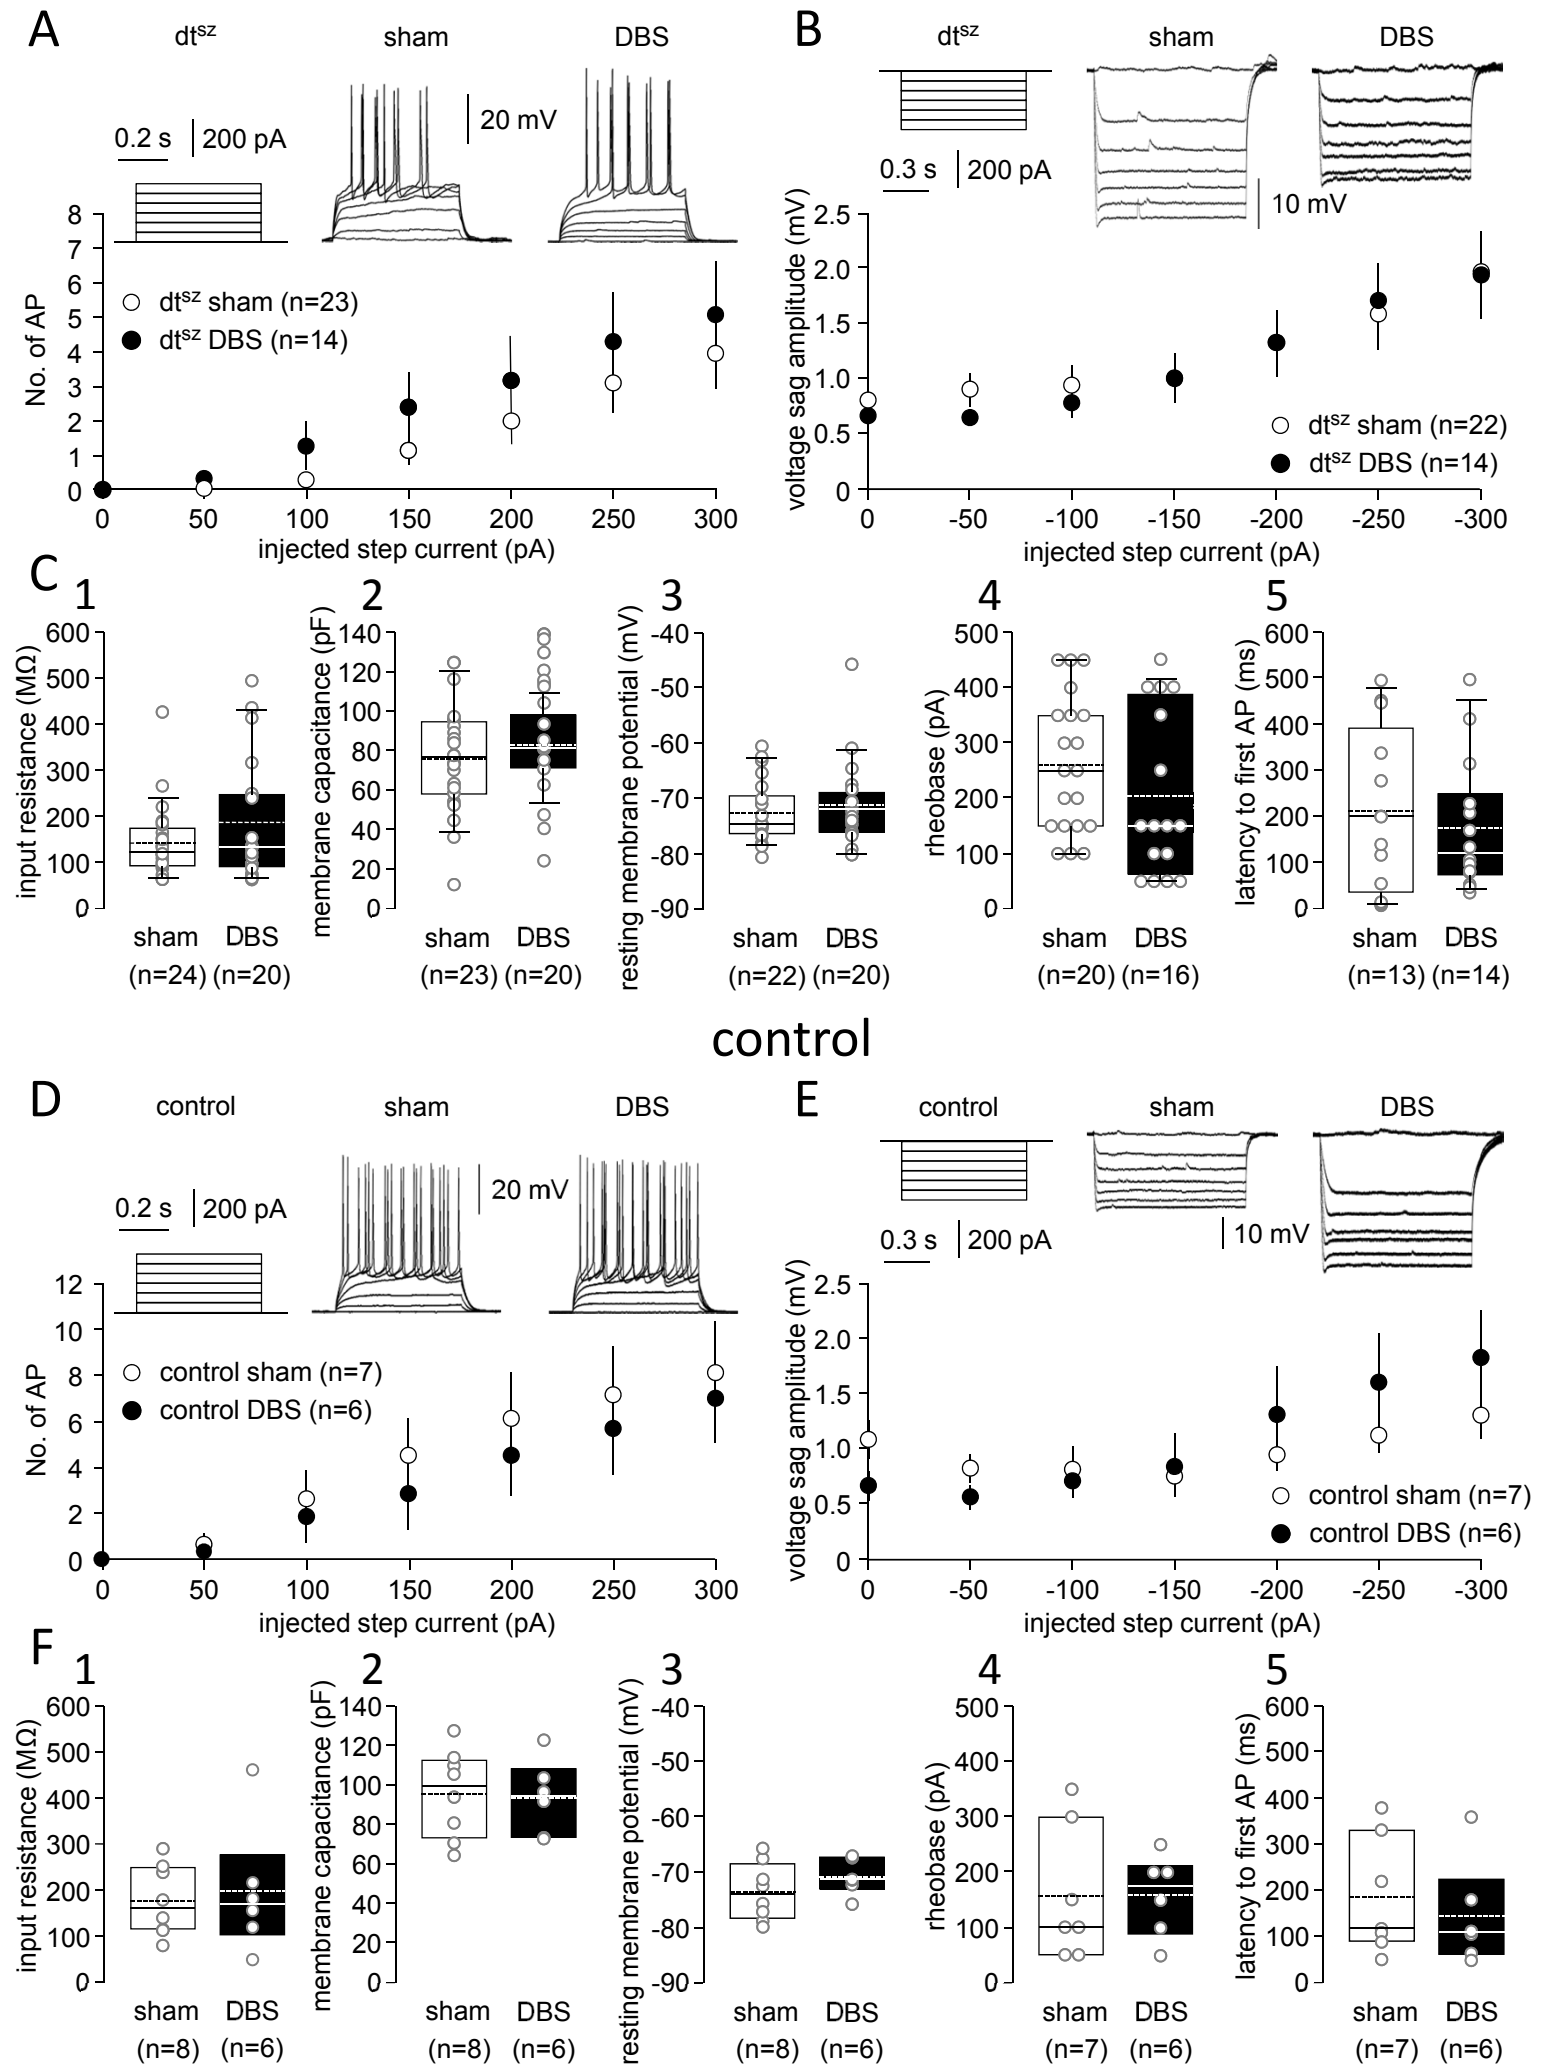

**Fig. 5**

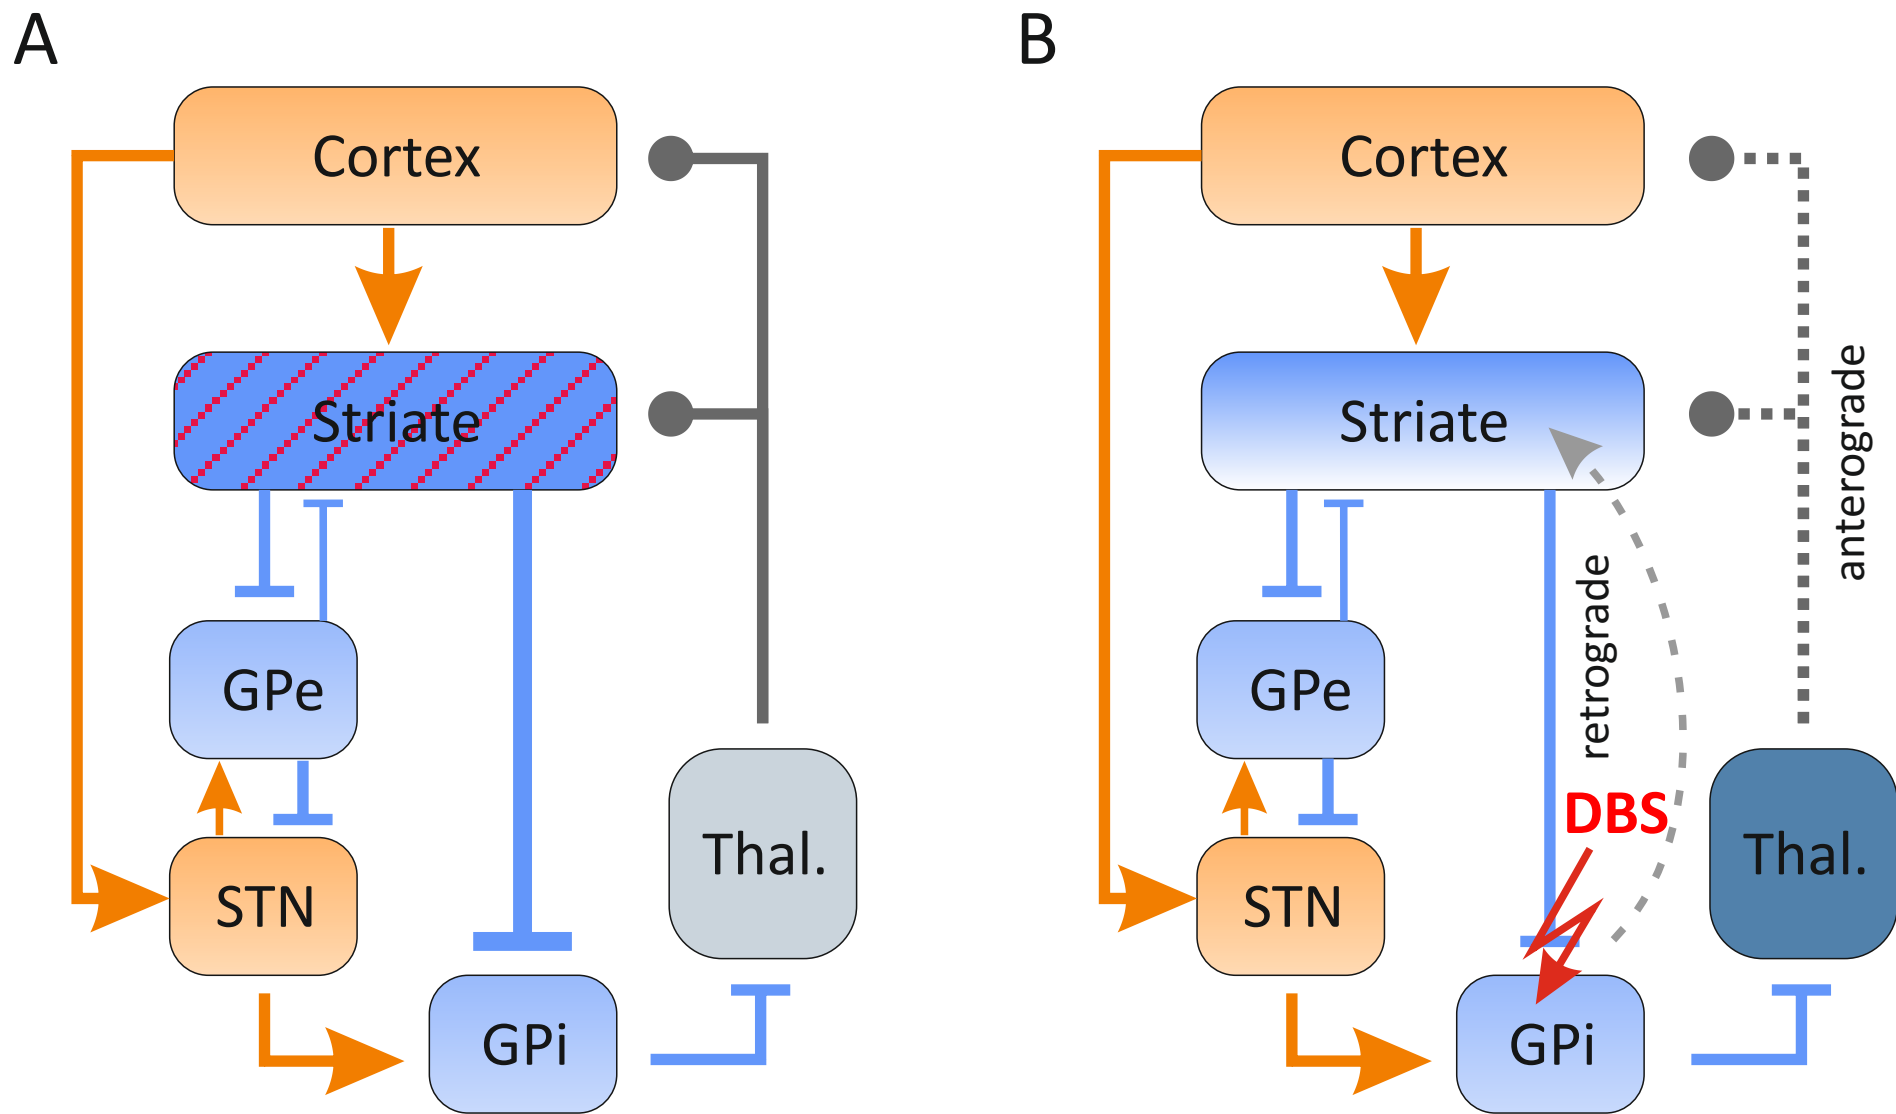

Fig. 6
